# Supplementary material
Source: PubMed Central journal article supplement (PMC8518926)
Supplement: HEP-74-2201-s001.pdf [file HEP-74-2201-s001.pdf]

Supplemental Materials for the MS by Michael Johnston et al

**Olaparib Inhibits Tumor Growth of Hepatoblastoma in Patient Derived Xenograft Models**

## List of probe mixtures for QRT-PCR

TaqMan probe mixtures were purchased from Thermo Fisher: 18s, Hs03003631\_g1; POU5F1, Hs04260367\_gH; THY-1, Hs00264235\_m1; DLK1, Hs00171584\_m1; CYP3A4, Hs00604506\_m1; CYP2A6, Hs00868409\_s1; CYP2B6, Hs041838409\_s1; CYP2C8, Hs02383390\_s1; CYP1A2, Hs00167972\_m1; CYP2E1, Hs00559367\_m1; PCK1, Hs01572978\_g1; SCL22A7, Hs00198527\_m1; SCL22A1, Hs00427552\_m1; SCL10A1, Hs00161820\_m1; SLC22A18, Hs00180039\_m1; PSM10, Hs01100439\_g1; C/EBP $\alpha$ , Hs00269972\_s1; GPC3, Hs01018936\_m1; PARP1, Hs 00242302\_m1; and REG3a, Hs-1-55563\_gH.

## Supplemental Information for Experimental Procedures.

### PDX Establishment

For surgical preparation, fresh tumor fragments were briefly maintained in cell culture medium in combination with penicillin/streptomycin with/without 5% BSA on ice. Samples were fractionated into 4x3 mm fragments. These fragments were placed within an interscapular subcutaneous flap in athymic nude mice which were 6-8 weeks of age at surgery (Athymic Nude-Foxn1nu, ENVIGO-Harlan Laboratories, Gannat, France). Tumor growth for specimens within our studies had confirmed growth 1 to 2 months. HBL tumors with successful were serially transplanted and subsequently confirmed for preservation by comparative examination histologically.

### In-vivo studies

Two arms of five well-established PDX HBL lines were utilized (Supplemental Figure 4). Three mice were within each arm. All mice for each tumor were implanted on the same day. Following the latency period, once tumors were 100 mm<sup>3</sup>, mice were stratified into each treatment arm, with homogenous mean and median tumor volumes. All treatment protocols were based on internal guidelines on treatment toxicity and administration schedules. Animals were weighed and tumor volume was recorded three to four days out of the week and observed for physical symptoms including appearance, behavior, and clinical changes.

### Antibodies Utilized

The following antibodies were used: PARP1 (Santa Cruz), p-S6-p53 (Santa Cruz; sc-61), Ku70 (Santa Cruz; sc-1487), NRF2 (Santa Cruz; sc-81342), PGAP1 (Invitrogen: sc-PA5 72340), RUNDC1 (Abcam, sc-AB 151583), Hace1 (Abcam; sc-133637), JNK1/2 (Cell Signaling Technologies; 9252S), p-JNK1/2 (Cell Signaling Technologies; 4668S), cyclin D1 (Santa Cruz; sc-753), Gank (Cell Signaling Technologies; 12985S), cdc2 (Santa Cruz; sc-954), CY3A4 (Santa Cruz; sc-30621), HDAC1 (EMD Millipore; 05-100-I), C/EBP-alpha (Santa Cruz; sc-61), p21 (Santa Cruz; sc-6246), HNF4-alpha (Perseus Proteomics; PP-K9218-00) and b-actin (Sigma; A5316). Whole gel images of Western blots are shown in Supplemental Figures S3-S19.

### Protein Isolation and Western Blotting.

In this study, we have used nuclear extracts and whole cell extracts (WCE).

**Nuclear extracts were isolated by following procedure.** Tissues were homogenized in buffer **A** containing 10mM Tris-HCL pH 7.5, 50mM NaCl, 5 mM MgCl<sub>2</sub>, 5% beta-mercaptoethanol and 10% glycerol. After centrifugation at 10,000 rpm for 10 min, the supernatant (cytoplasm) was saved. For extraction of nuclear proteins, we have used Buffer **B** which contains the same components plus 0.42M NaCl and 25% Sucrose. The pellets were re-suspended in 4 volumes of buffer B and incubated on ice for 20 min. After centrifugation at 10,000 rpm for 10 min, the supernatant (nuclear extract) was immediately used Western blotting, Co-IPs or for SEC.

**Whole Cell Extracts** were isolated by homogenization of liver tissues in buffer B and subsequent steps described above for isolation of nuclear extracts. To protect protein integrity, we mainly used protein extracts without freezing.

**Co-Immunoprecipitations were performed using an improved True blot protocol.** Since the main problem for Co-IP is the presence of the added IgG which provide very strong signals on Western blots, we used True blot system that utilizes secondary antibodies that do not recognize antibody added during IP step (after their destruction by boiling of samples in the modified loading buffer). Therefore, we boiled IP samples in provided loading buffer for 30 min, which in many cases completely destroys IgGs. After that, samples were loaded on 4-20% gradient gels (Bio-Rad), transferred to nitrocellulose membranes (Bio-Rad) and incubated with primary and secondary antibodies according to protocols. Dilution of each primary antibodies was determined by preliminary experiments and varied between 500 and 10,000 (beta-actin) depending on abundance of proteins.

**Supplemental Table 1: PDX HBL Patient Characteristics**

| Tumor Cod      | Sex | Age (Mo) | Type of Sample       | Surgery | Metastatic at Diagnosis | Main epithelial component               | Vascular Invasion | Nodules  | PRETEXT stage | Treatment protocol     | AFP at diagnosis (ng/mL) | AFP post-chemotherapy (ng/mL) | AFP % Decrease | B-catenin status                                                    | NFE2L2 Status | PDX Growth Latency (Days) |          |
|----------------|-----|----------|----------------------|---------|-------------------------|-----------------------------------------|-------------------|----------|---------------|------------------------|--------------------------|-------------------------------|----------------|---------------------------------------------------------------------|---------------|---------------------------|----------|
|                |     |          |                      |         |                         |                                         |                   |          |               |                        |                          |                               |                |                                                                     |               | 60-200 mm3                | 1764 mm3 |
| HB-295         | F   | 26       | Primary              | R       | Y                       | Fetal                                   | Y                 | Multiple | II            | SIOPEL4                | 585,350                  | 1,400                         | 99.76%         | Per Xentech pdf, CTNNB1 mutation, doesn't list specific type though | -             | ~12                       | ~28      |
| HB-268         | F   | 12       | Primary              | R       | N                       | Embryonal+crowded fetal+macrotrabecular | -                 | -        | II            | SIOPEL6                | 620,000                  | 200,000                       | 67.74%         | Exon 3 Deletion                                                     | WT            | ~21                       | ~29      |
| HB-303         | F   | 69       | Primary              | R       | N                       | Fetal                                   | N                 | Multiple | II            | SIOPEL6                | 158,645                  | 26,000                        | 83.61%         | -                                                                   | -             | ~19                       | ~28      |
| HB-243-RED-225 | M   | 52       | Intrahepatic relapse | LT      | N                       | Embryonal                               | Y                 | Multiple | Relapse       | CARBOPLATIN + VEPESIDE | 6,000                    | 5,000                         | 16.67%         | Exon 3 Deletion                                                     | WT            | ~16                       | ~28      |
| HB-283         | M   | 24       | Primary              | R       | N                       | Embryonal+crowded fetal                 | -                 | -        | II            | SIOPEL6                | 95,000                   | 2,475                         | 97.39%         | Exon 3 Deletion                                                     | WT            | ~18                       | ~28      |

Liver resection=R; Liver transplant=LT, F=Female, M=Male

**Supplemental Table 2: Hepatocellular Carcinoma Bio Bank**

| <b>Tumor Code</b> | <b>Age (Years)</b> | <b>Sex</b> | <b>Etiology</b> | <b>Metastatic at Diagnosis</b> | <b>Pathology</b>                                       | <b>AFP at Diagnosis</b> | <b>AFP Post-Surgery</b> |
|-------------------|--------------------|------------|-----------------|--------------------------------|--------------------------------------------------------|-------------------------|-------------------------|
| HCC1              | 78                 | M          | Hepatitis B     | No                             | Sarcomatoid HCC, +Vascular invasion                    | 6300                    | 343                     |
| HCC2              | 50                 | M          | Hepatitis B     | No                             | Moderately differentiated HCC, +Vascular invasion      | 2                       | 2                       |
| HCC3              | 68                 | M          | NAFLD           | No                             | Well to moderately differentiated, - Vascular invasion | 2.5                     | 2                       |
| HCC4              | 72                 | M          | NAFLD           | No                             | Moderately differentiated HCC, +Vascular invasion      | 31                      | 1                       |
| HCC5              | 57                 | M          | Hepatitis C     | No                             | Moderately differentiated HCC, +Vascular invasion      | 123                     | 2                       |

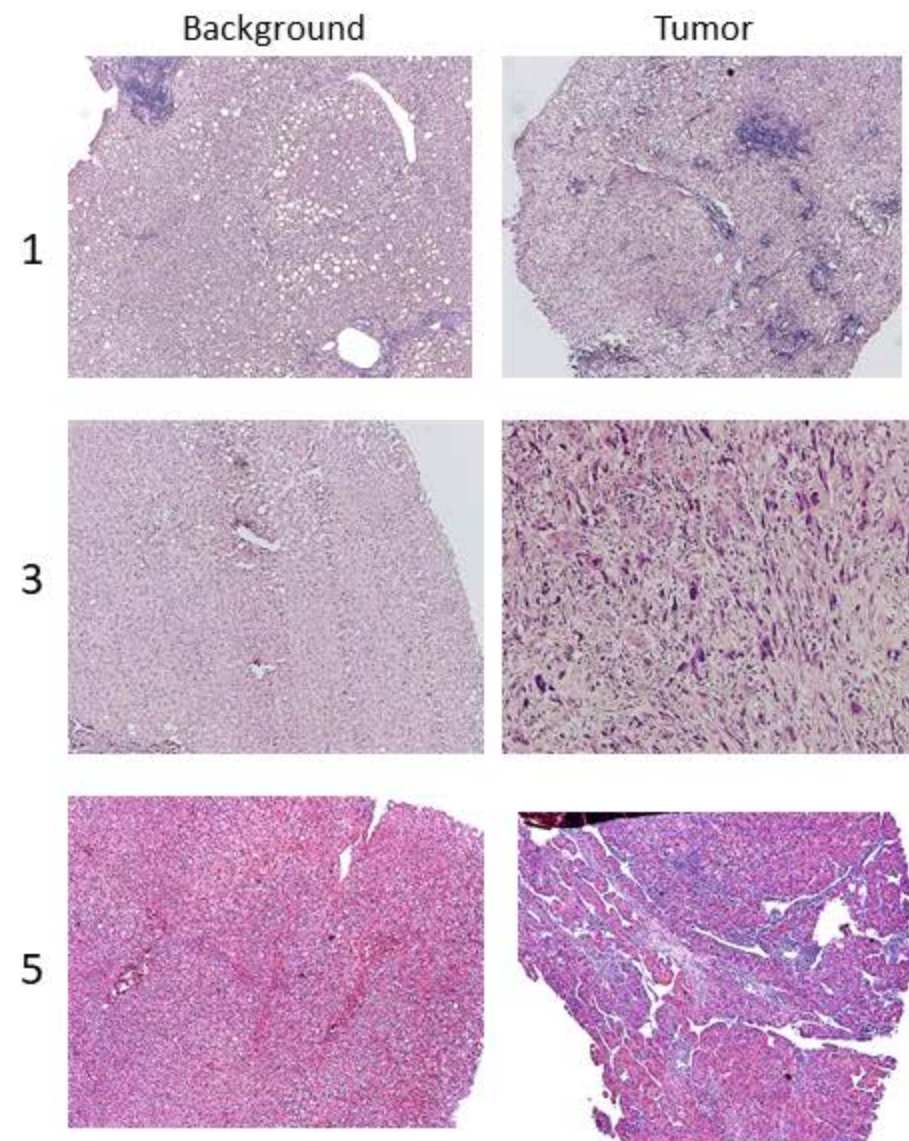

**Supplemental Figure 1.** Examples of H&E staining of livers of HCC patients

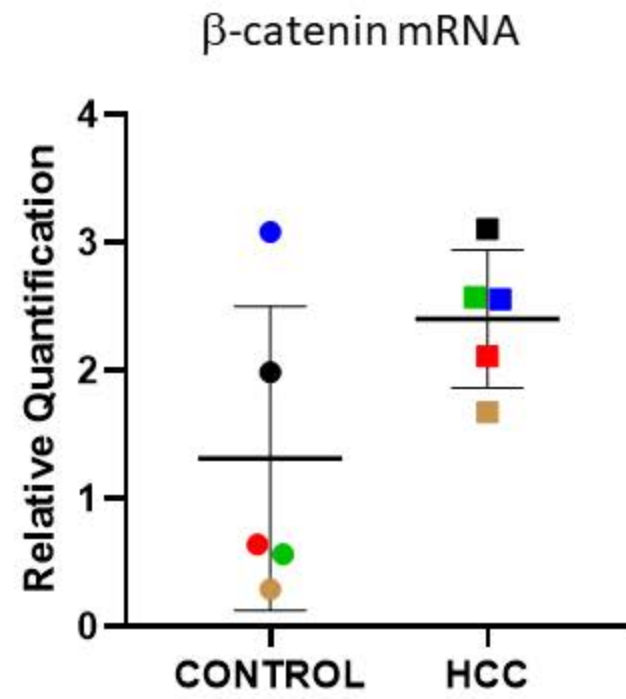

**Supplemental Figure 2.** Levels of  $\beta$ -catenin mRNA in HCC samples was determined by QRT-PCR.



**A**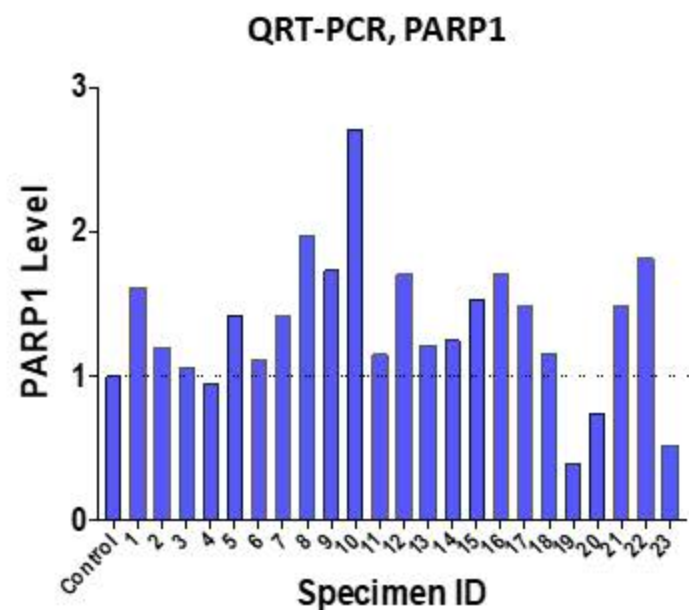**B**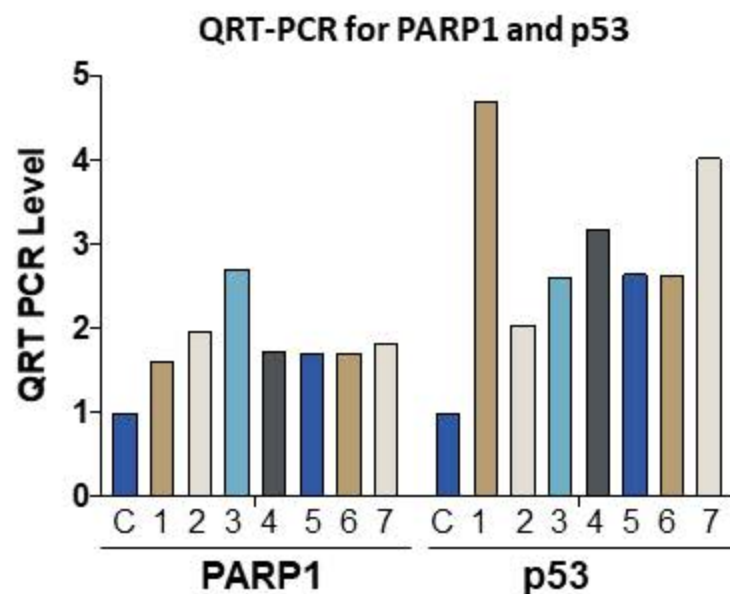

**Supplemental Figure 3. Selection of PDXs for the treatments with inhibitor of PAR1 Olaparib.** Examination of PARP1 and p53 expression in PDXs that were previously generated and characterized <sup>(21)</sup>. A) QRT-PCR-detected PARP1 in 23 generated PDXs. B) QRT-PCR for PARP1 and p53 in PDXs with high levels of PARP1. Control is RNA from a patients without liver disorders.



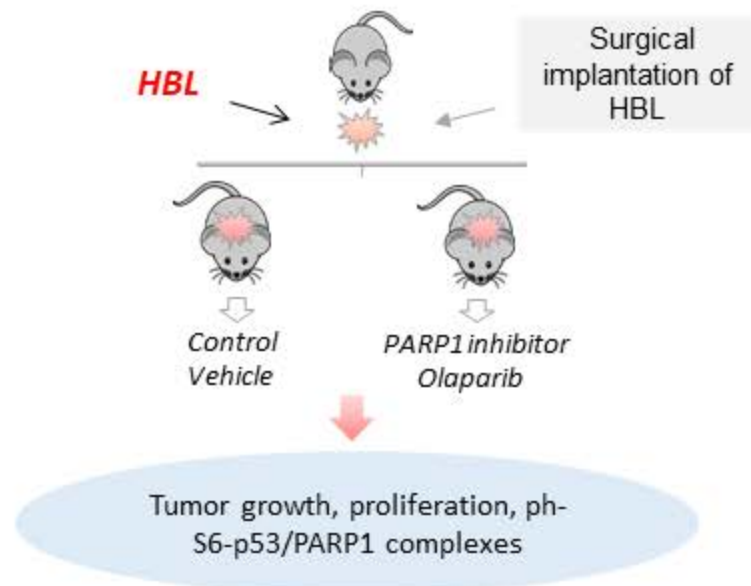

**Supplemental Figure 4.** A design for the treatments of PDXs with Olaparib.

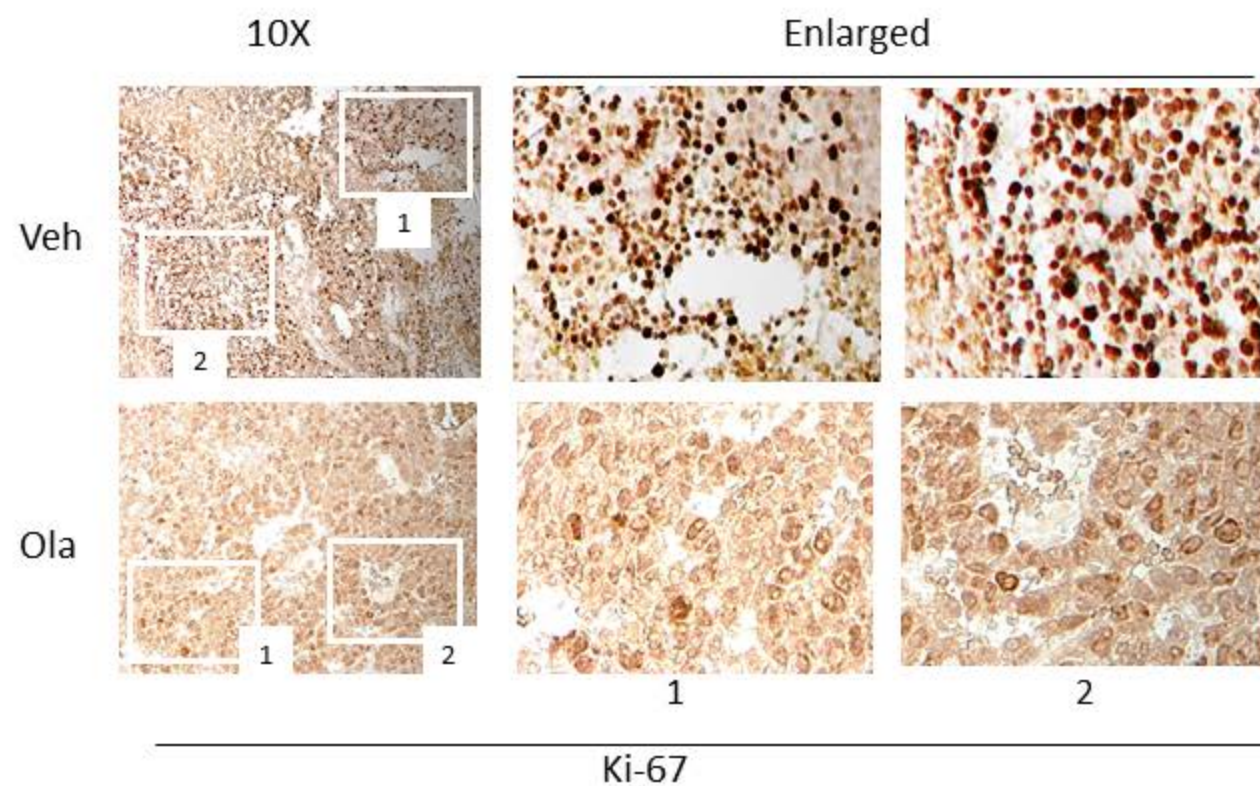

**Supplemental Figure 5.** An example of ki67 staining of the PDXs treated with vehicle and Olaparib. Boxes show regions of the PDXs which were enlarged on the right images.

*ALCD of NRF2 gene*

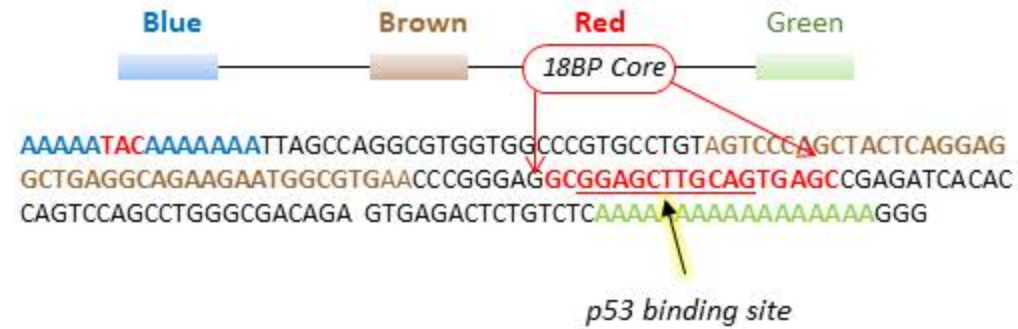

**Supplemental Figure 6.** Nucleotide sequence of ALCD in the NRF2 gene. 100% homological regions are shown by color boxes. P53 binding site within 18S core sequence is underlined.

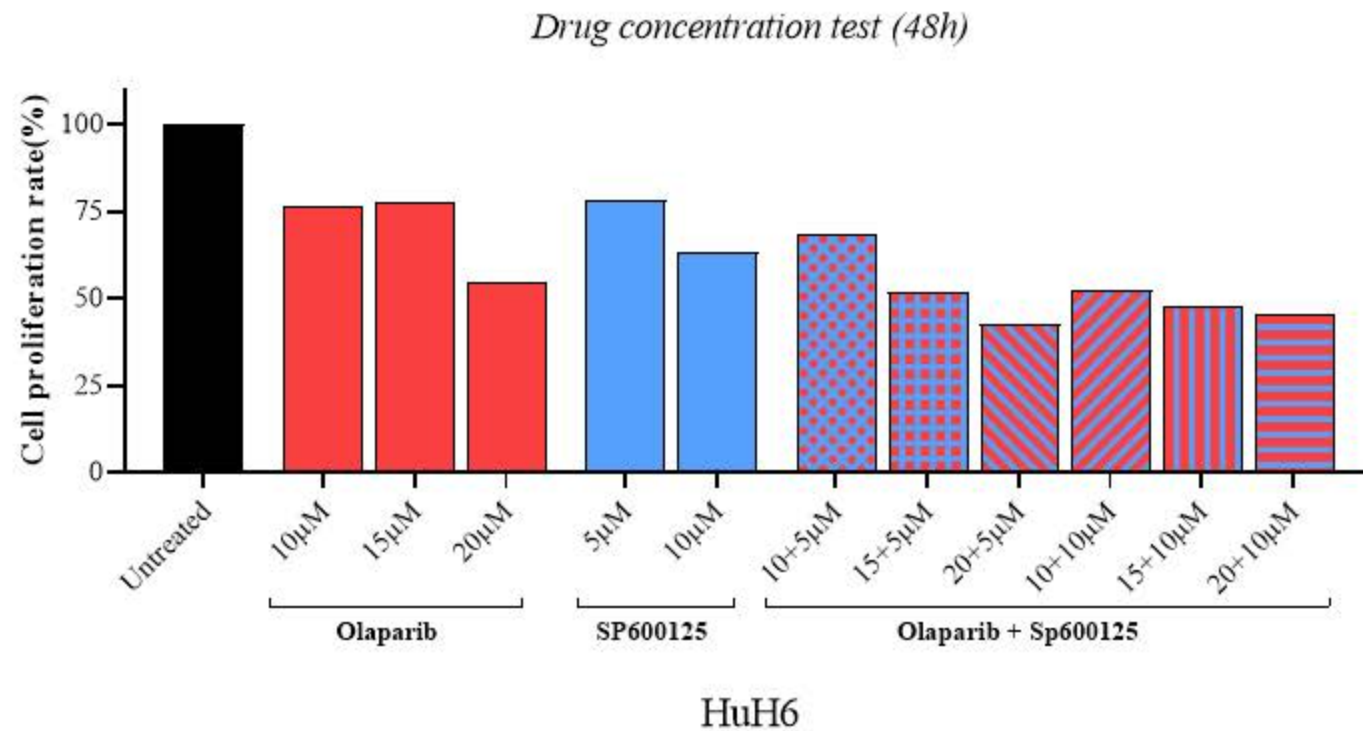

**Supplemental Figure 7. Drug concentration test to optimize treatments of Huh6 cells with Olaparib and SP600125.** Cells were treated for 48 hours with concentrations shown on the bottom. The assay was performed as described in Experimental Procedures.

Whole images of Western blots

Fig 1D

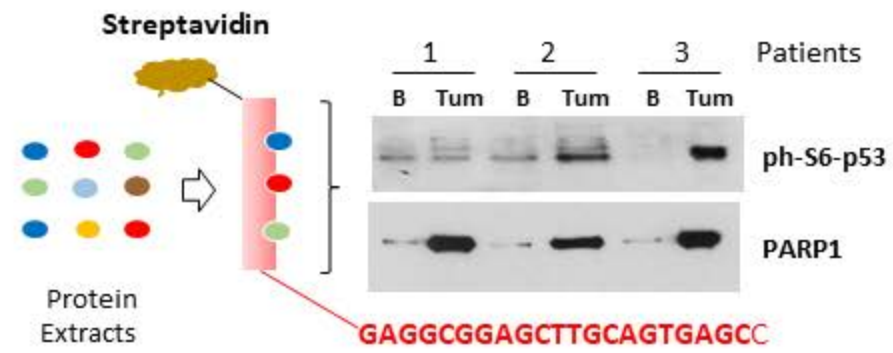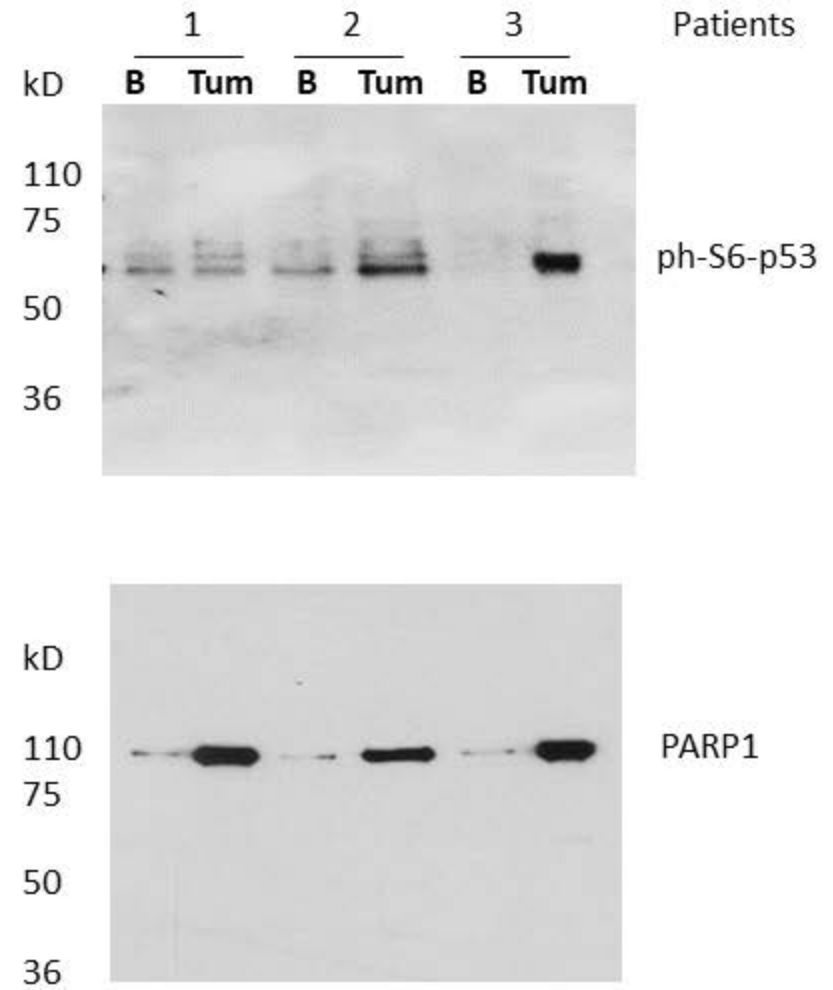

Fig 2B

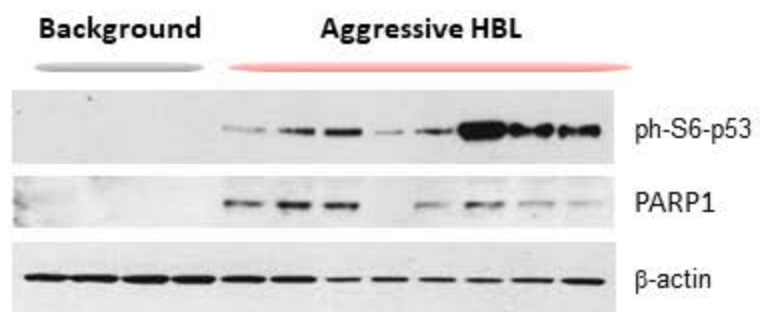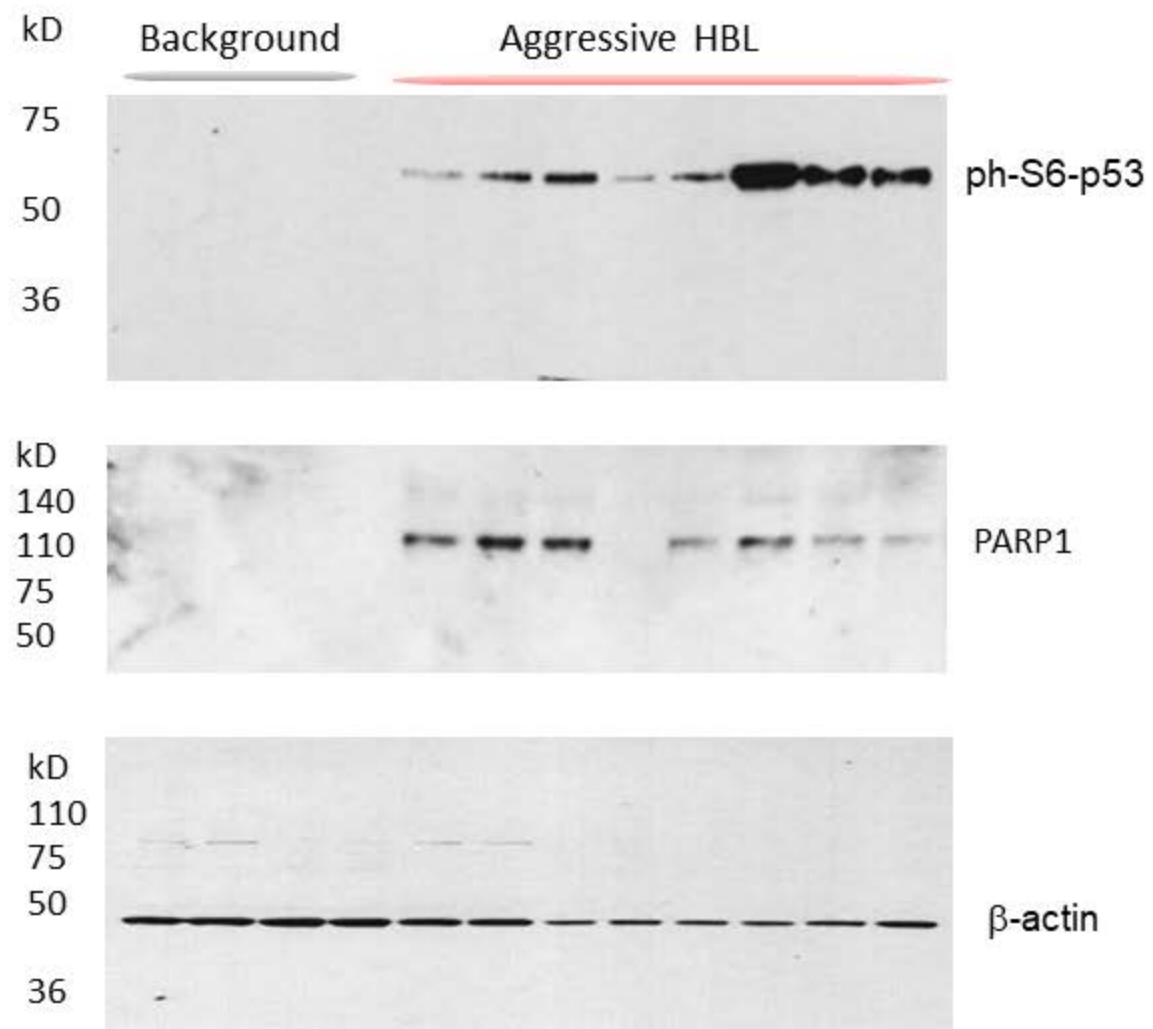

Whole images



Fig 2C

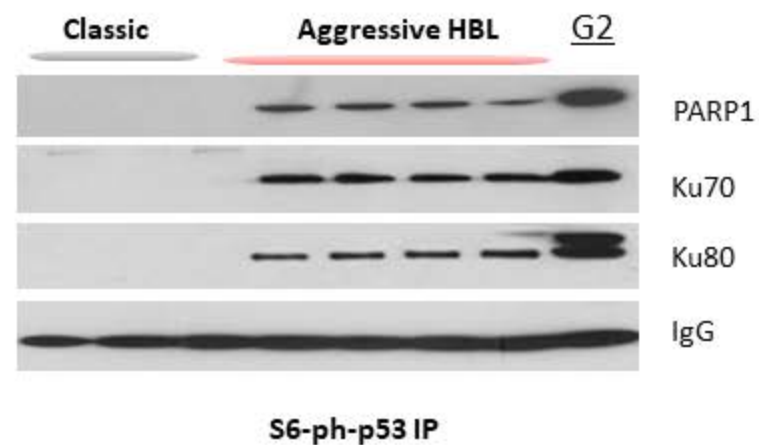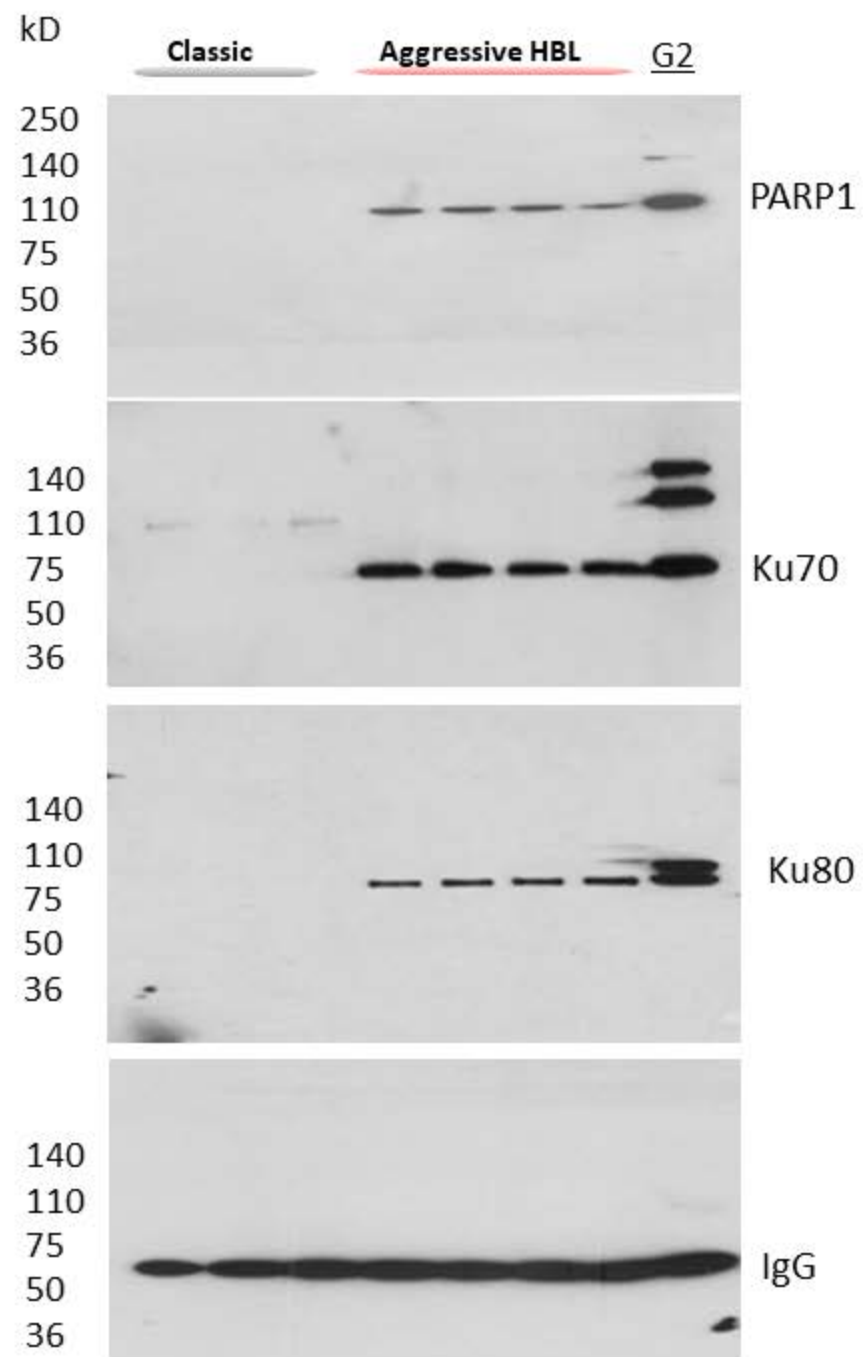

Fig 2D

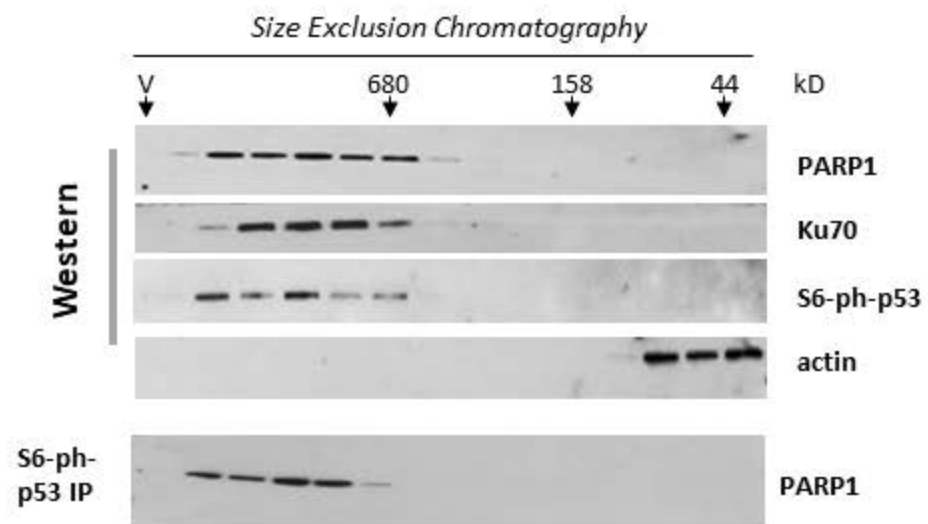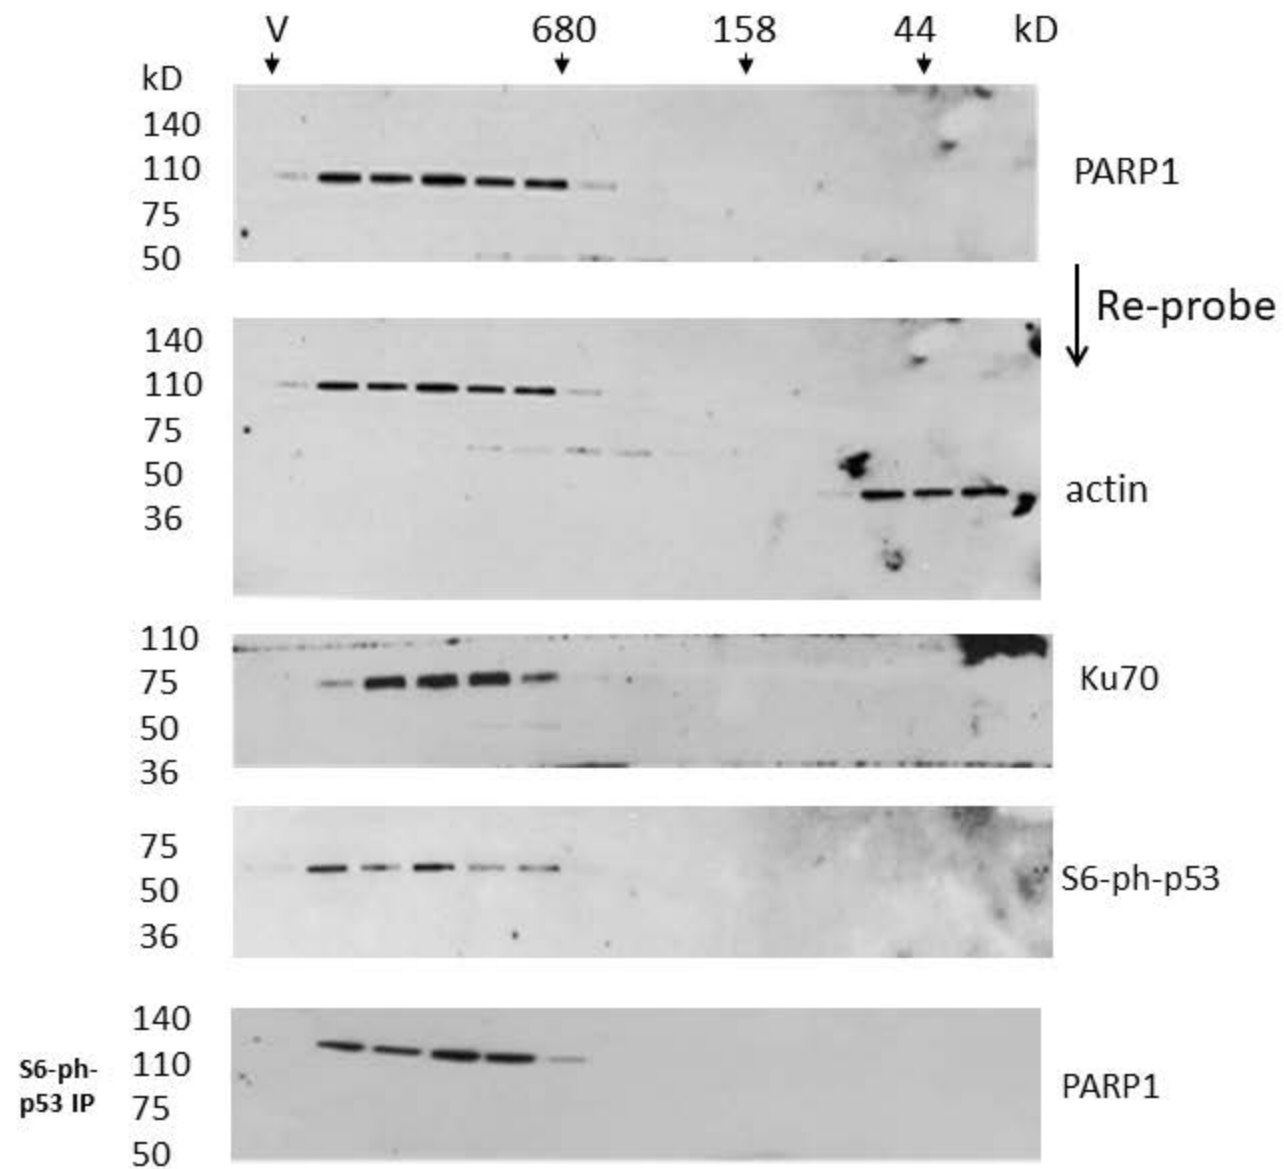

Whole images

Fig 2D

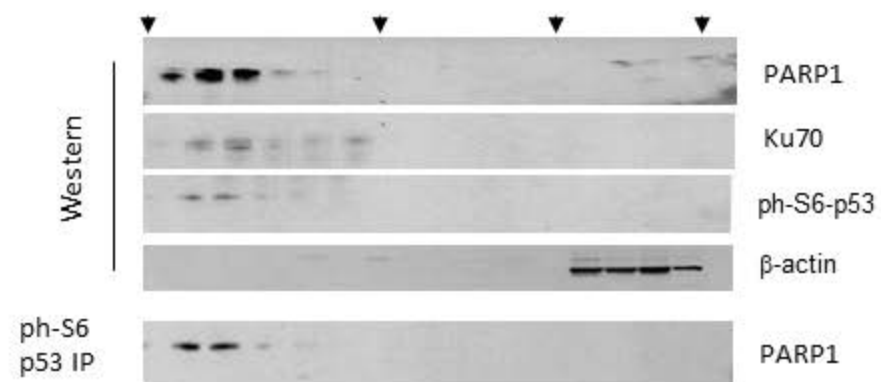

Supplemental Figure 12

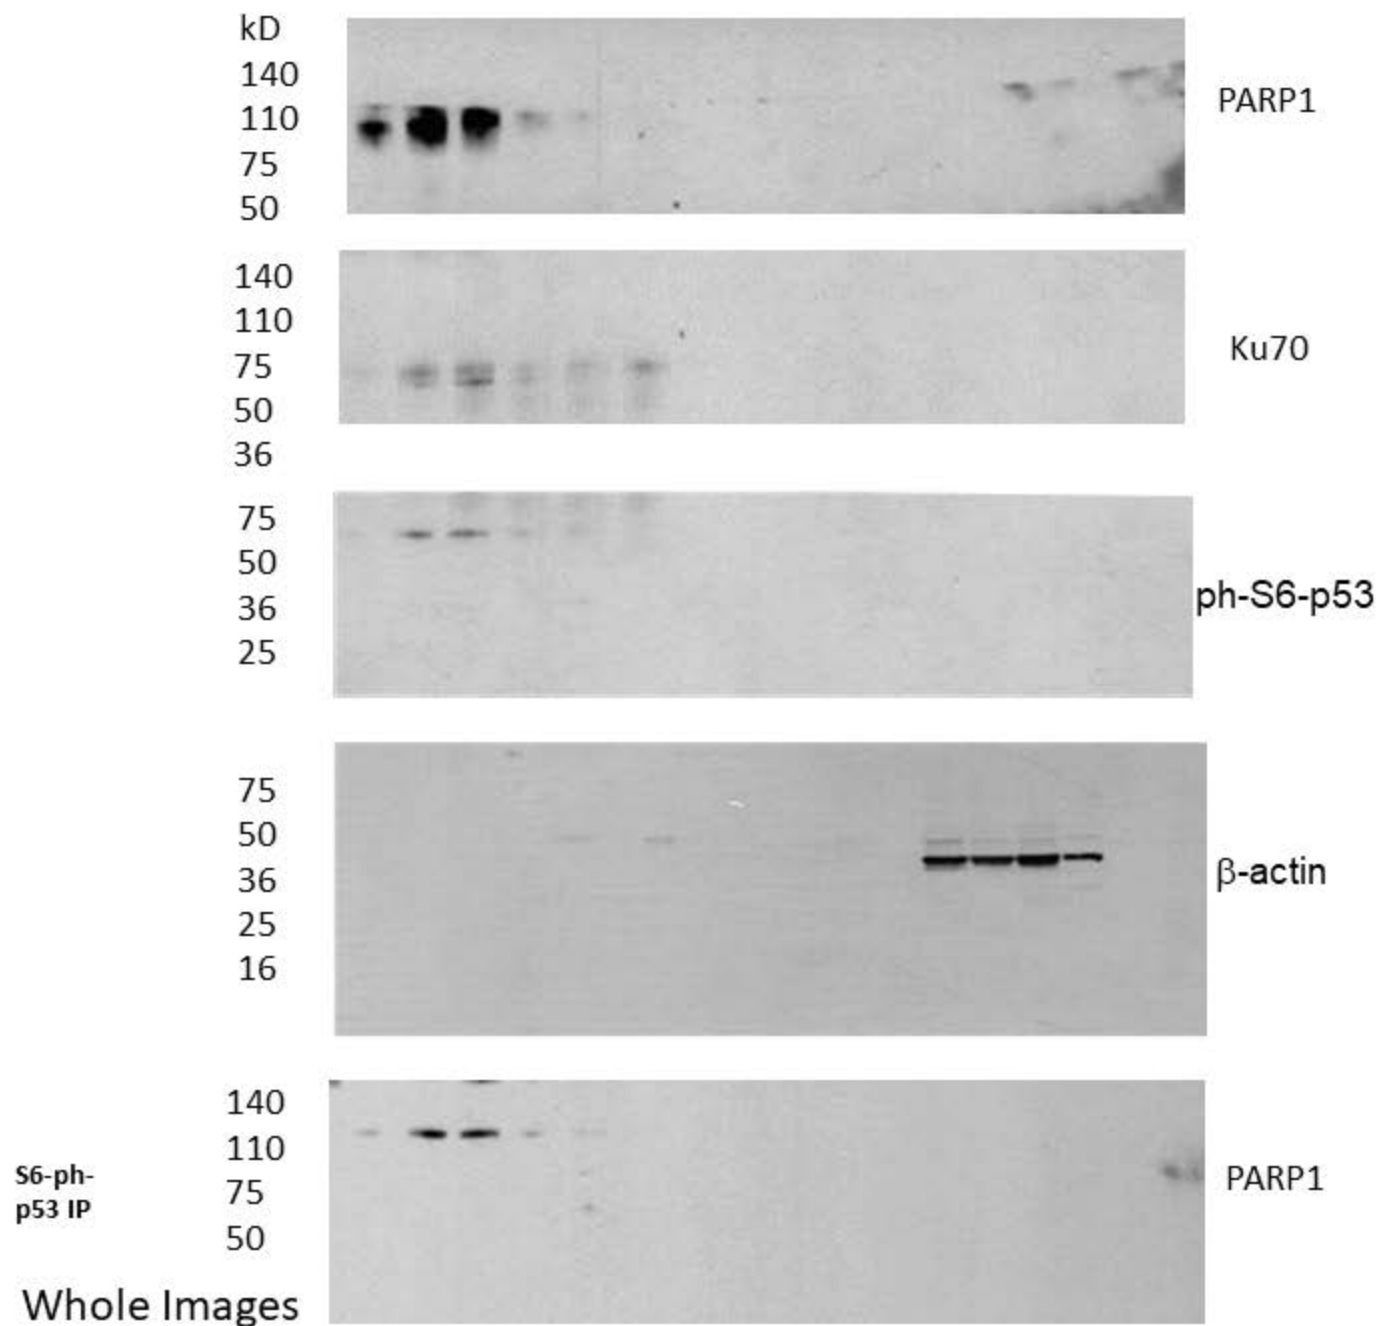

Fig 3D

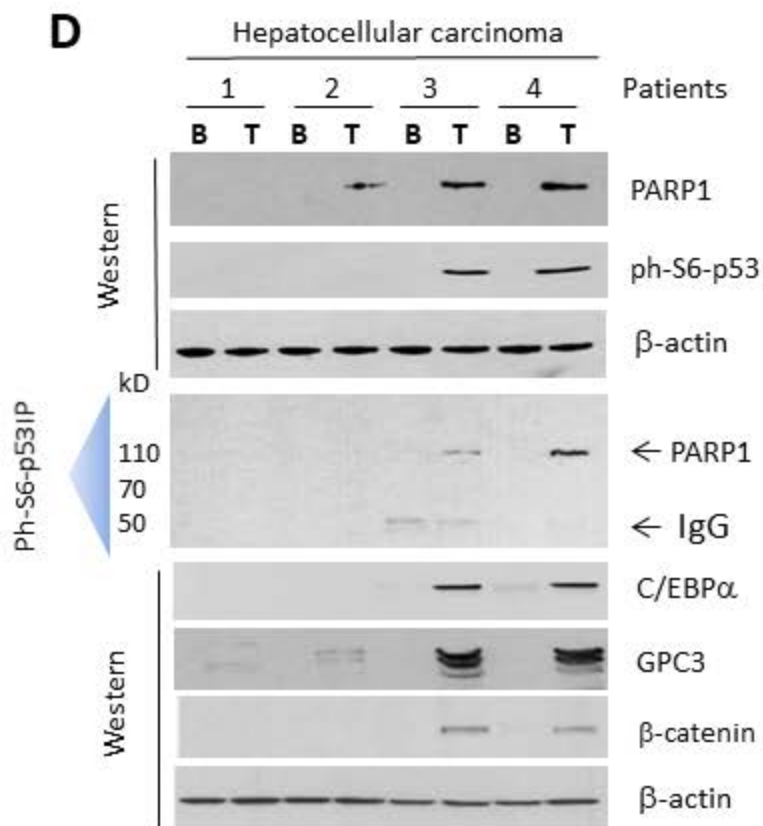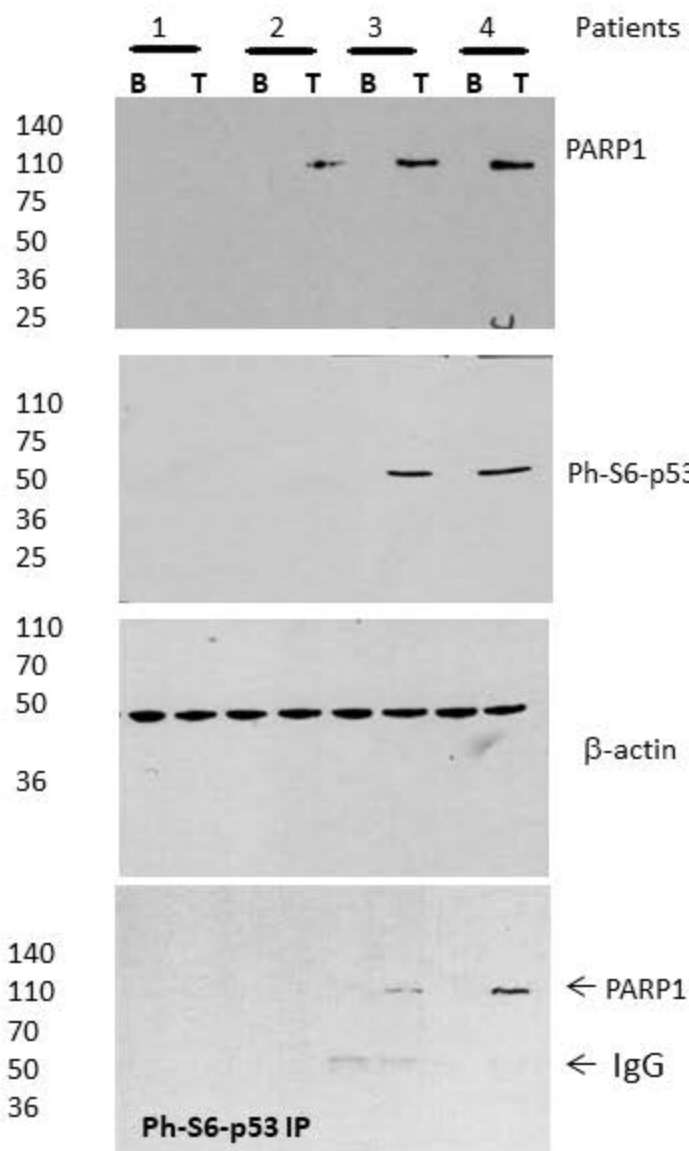

Whole images

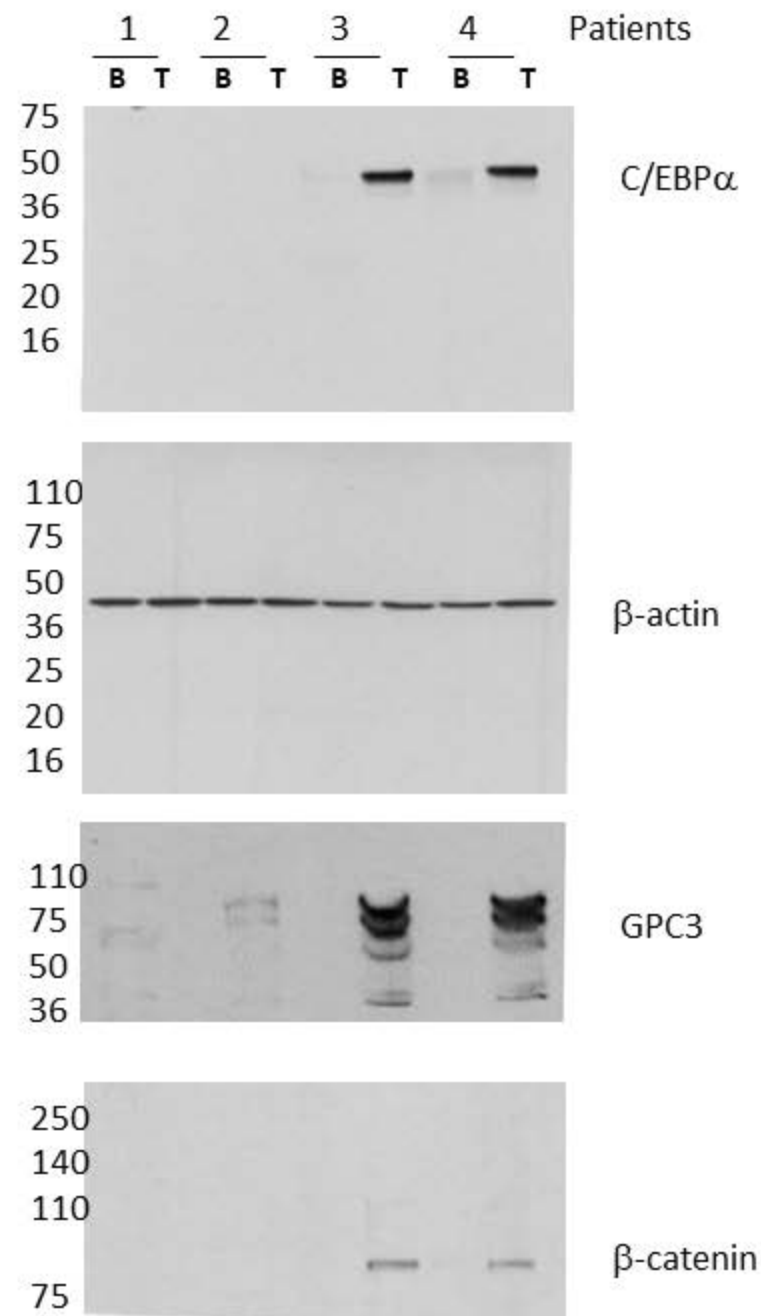

Fig 3E

**E**

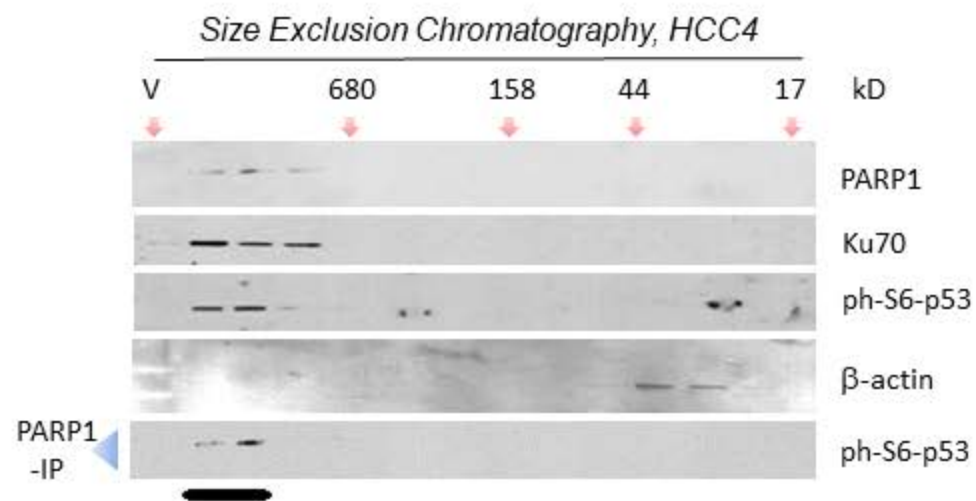

Supplemental Figure 14

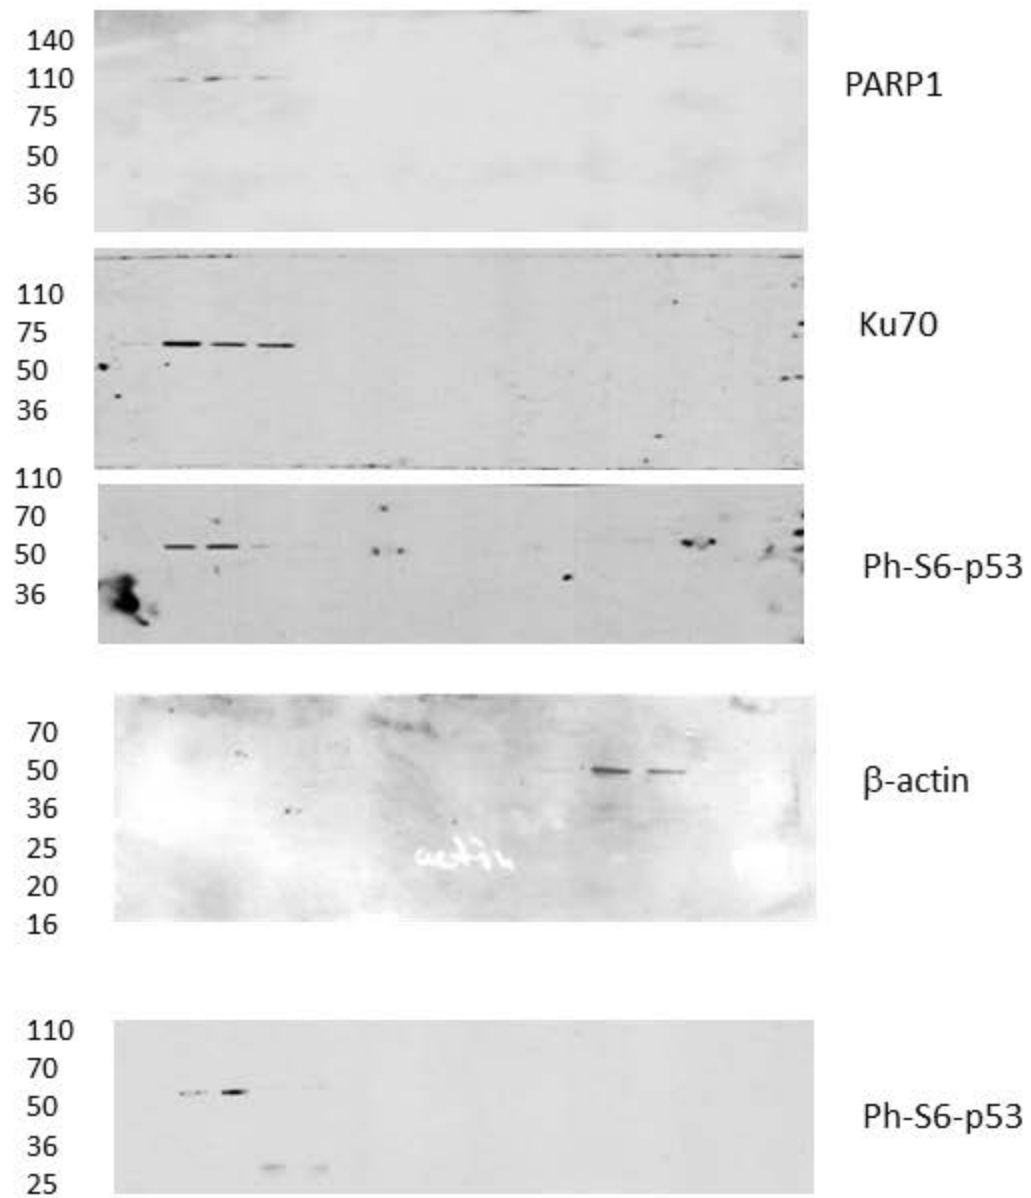

Whole images

Fig 4A

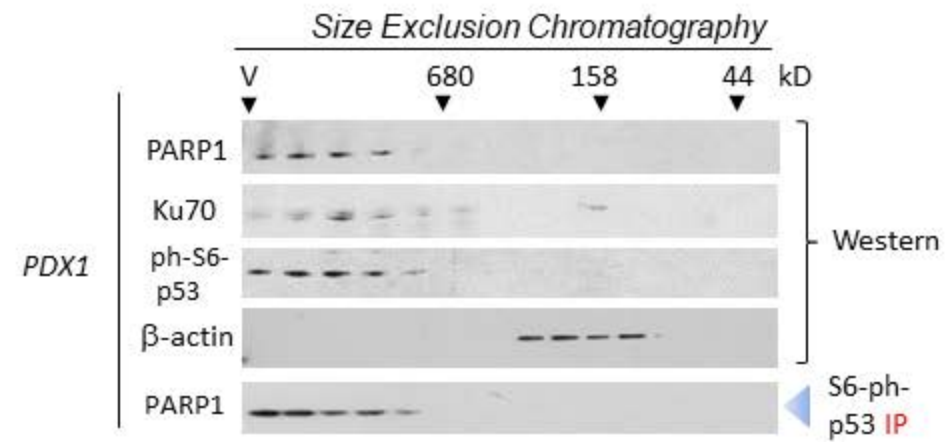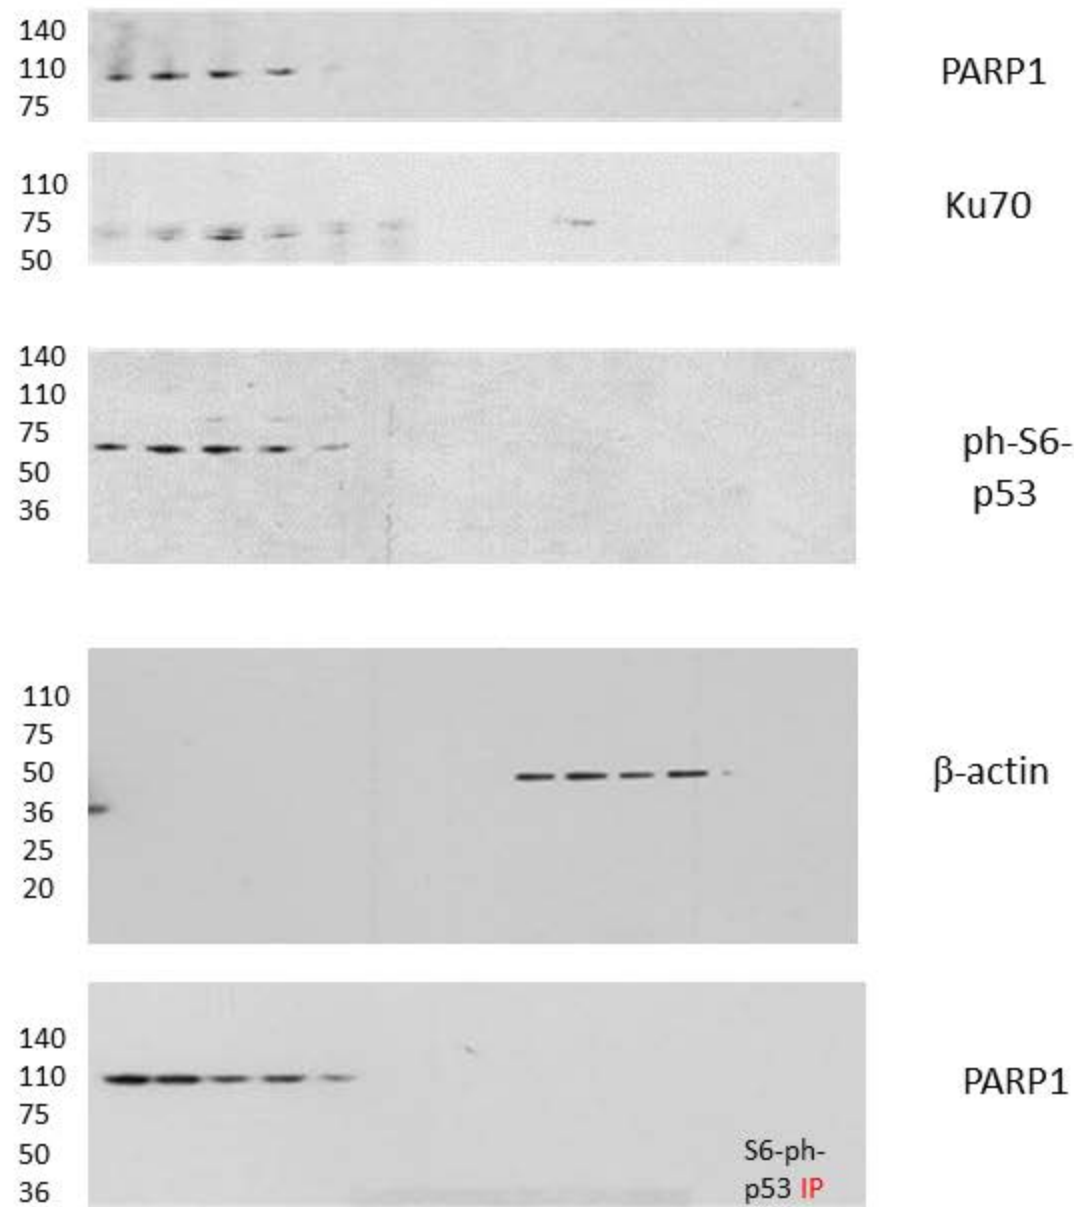

Fig 4A

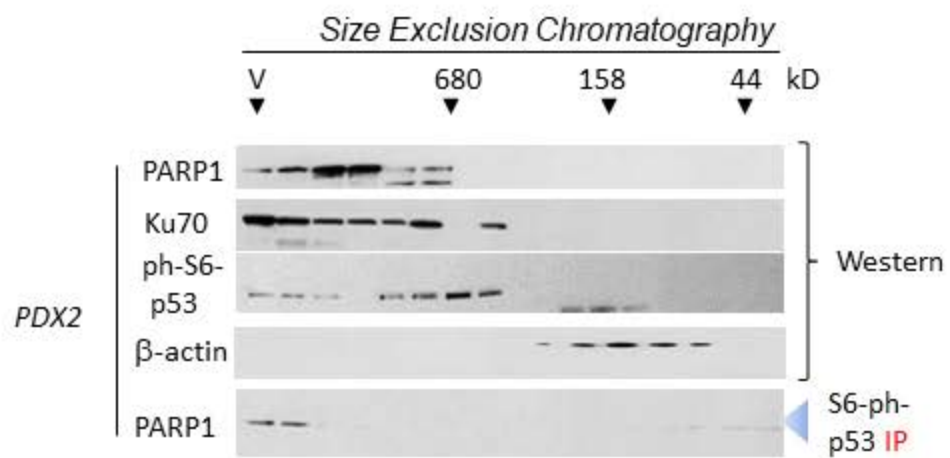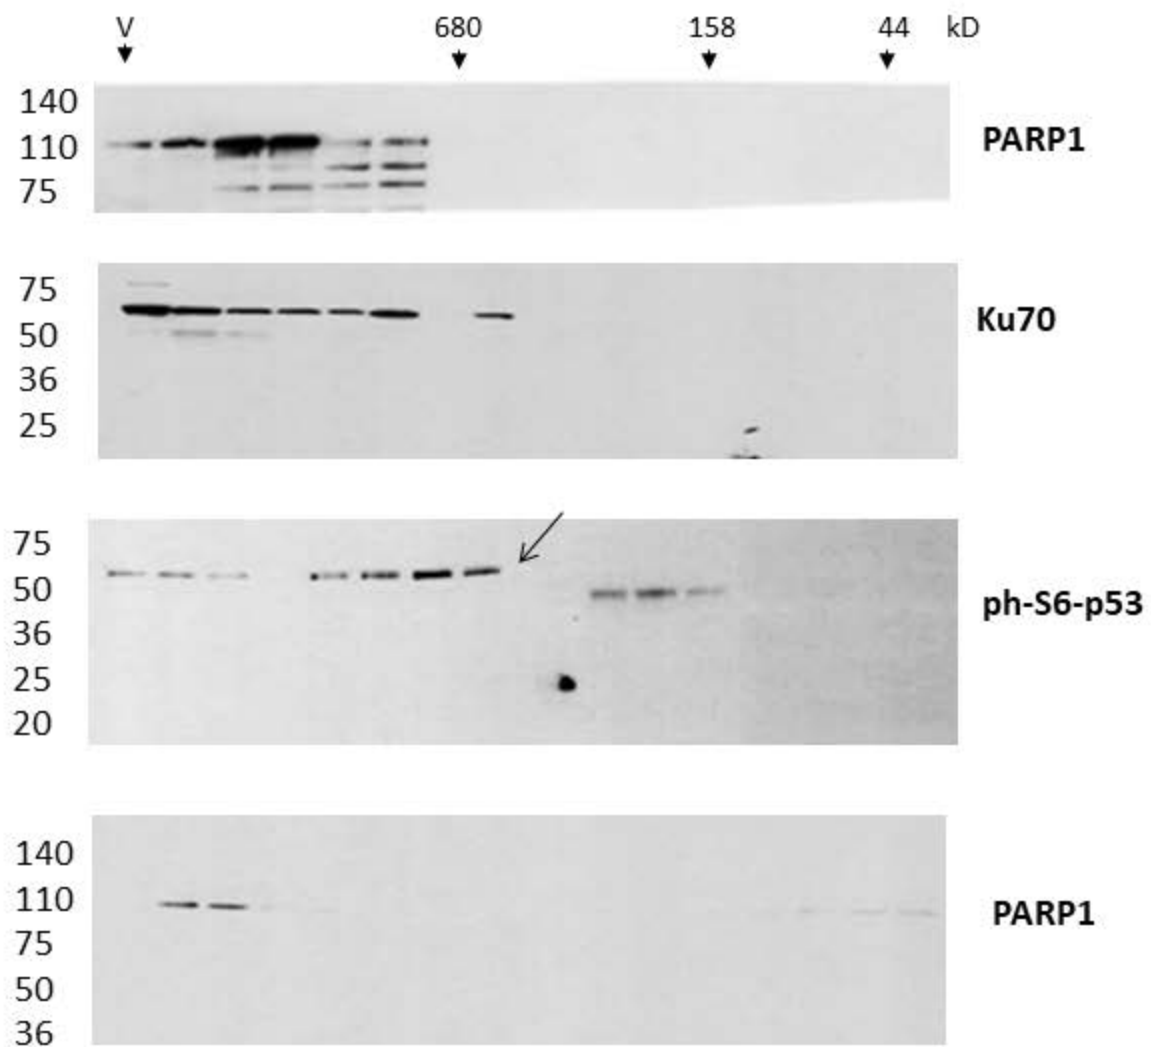

S6-ph-  
p53 IP

Whole images



Fig 4A

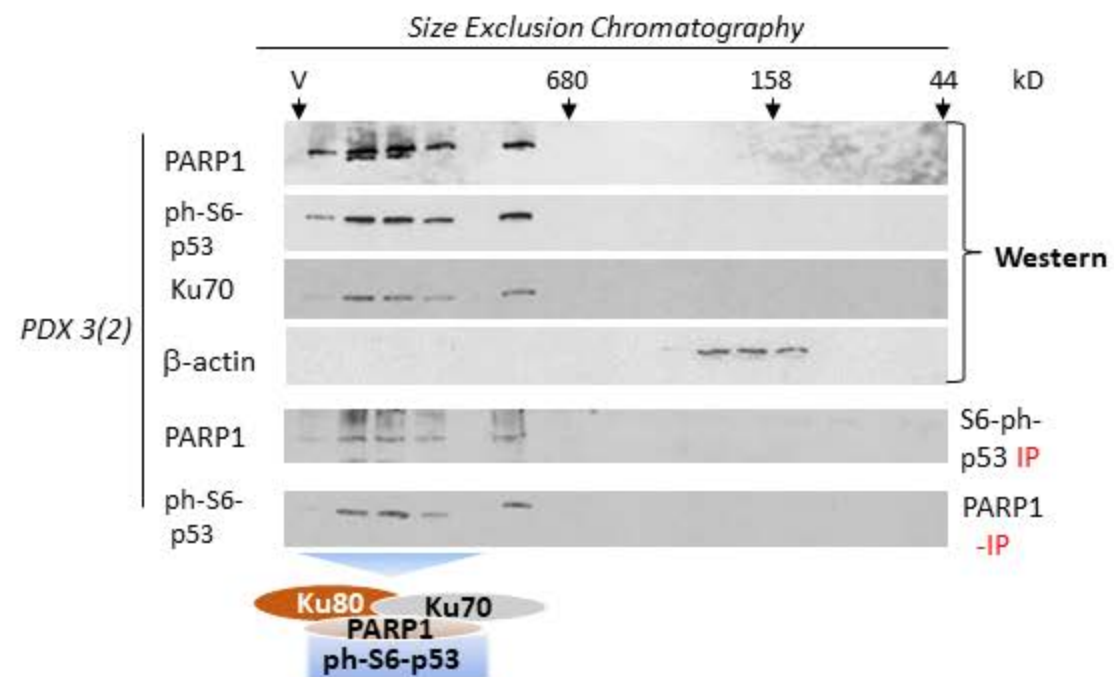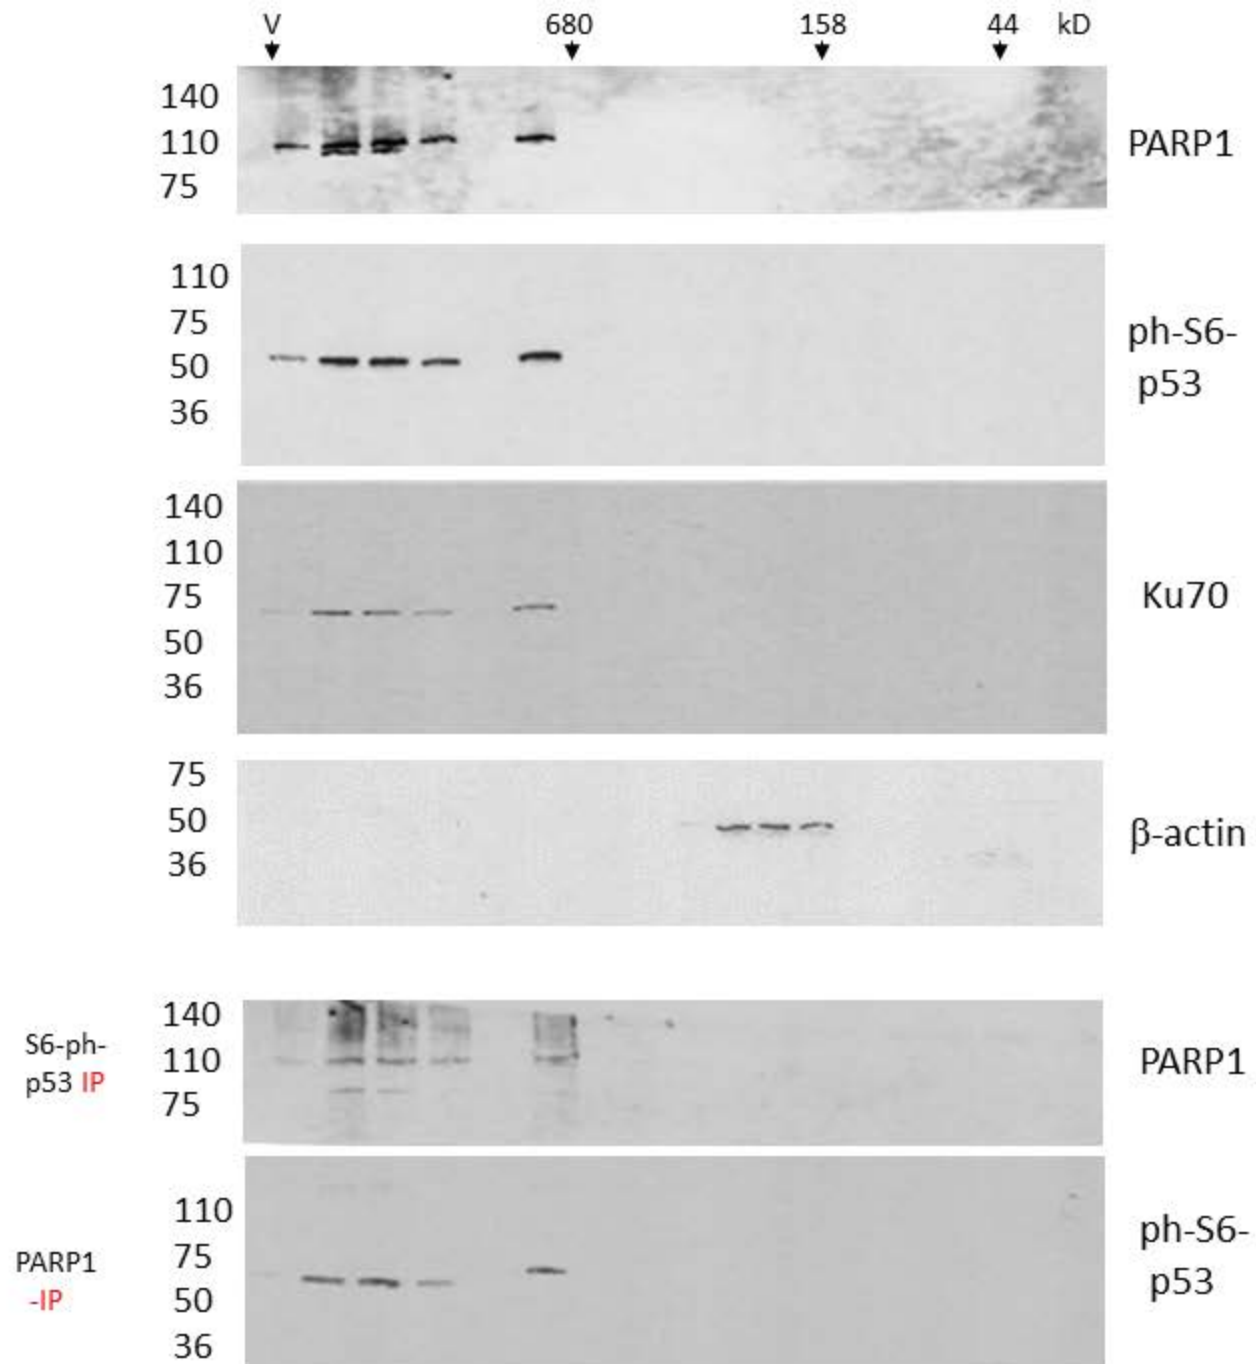

Whole images

FIG 5A

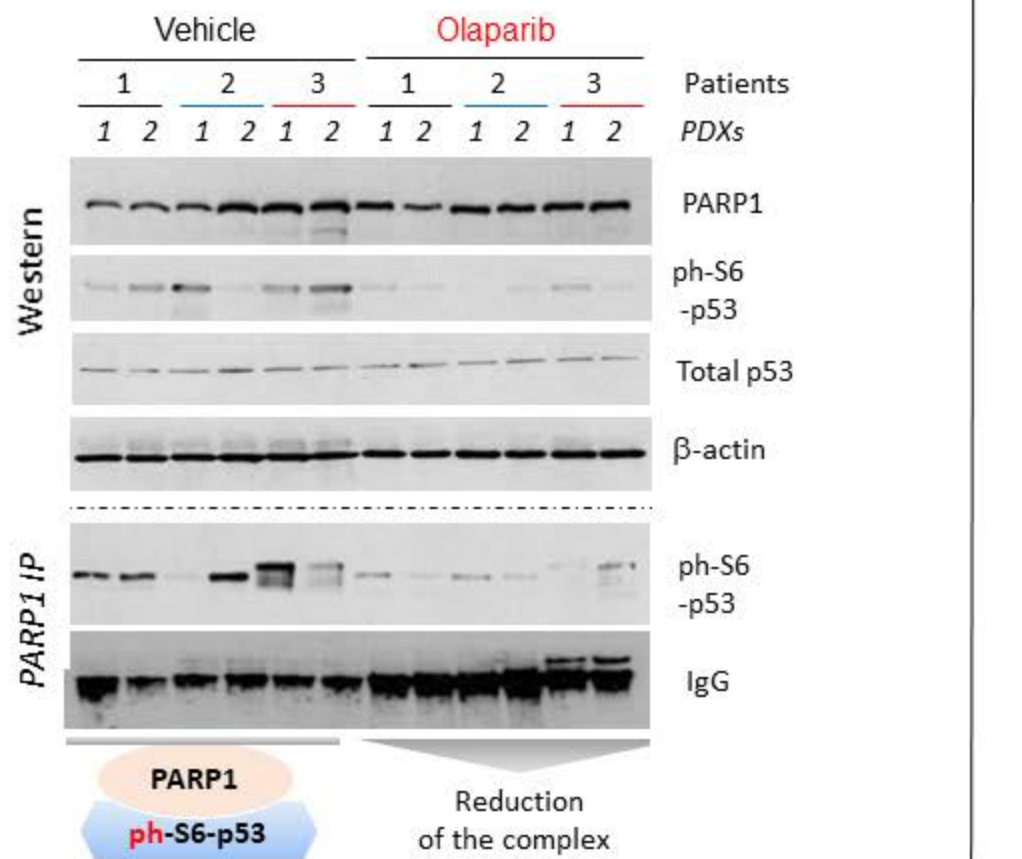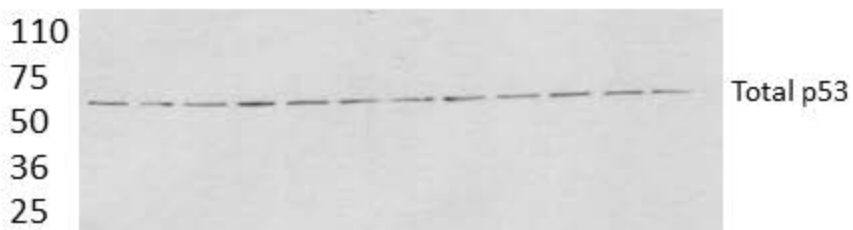

Whole images

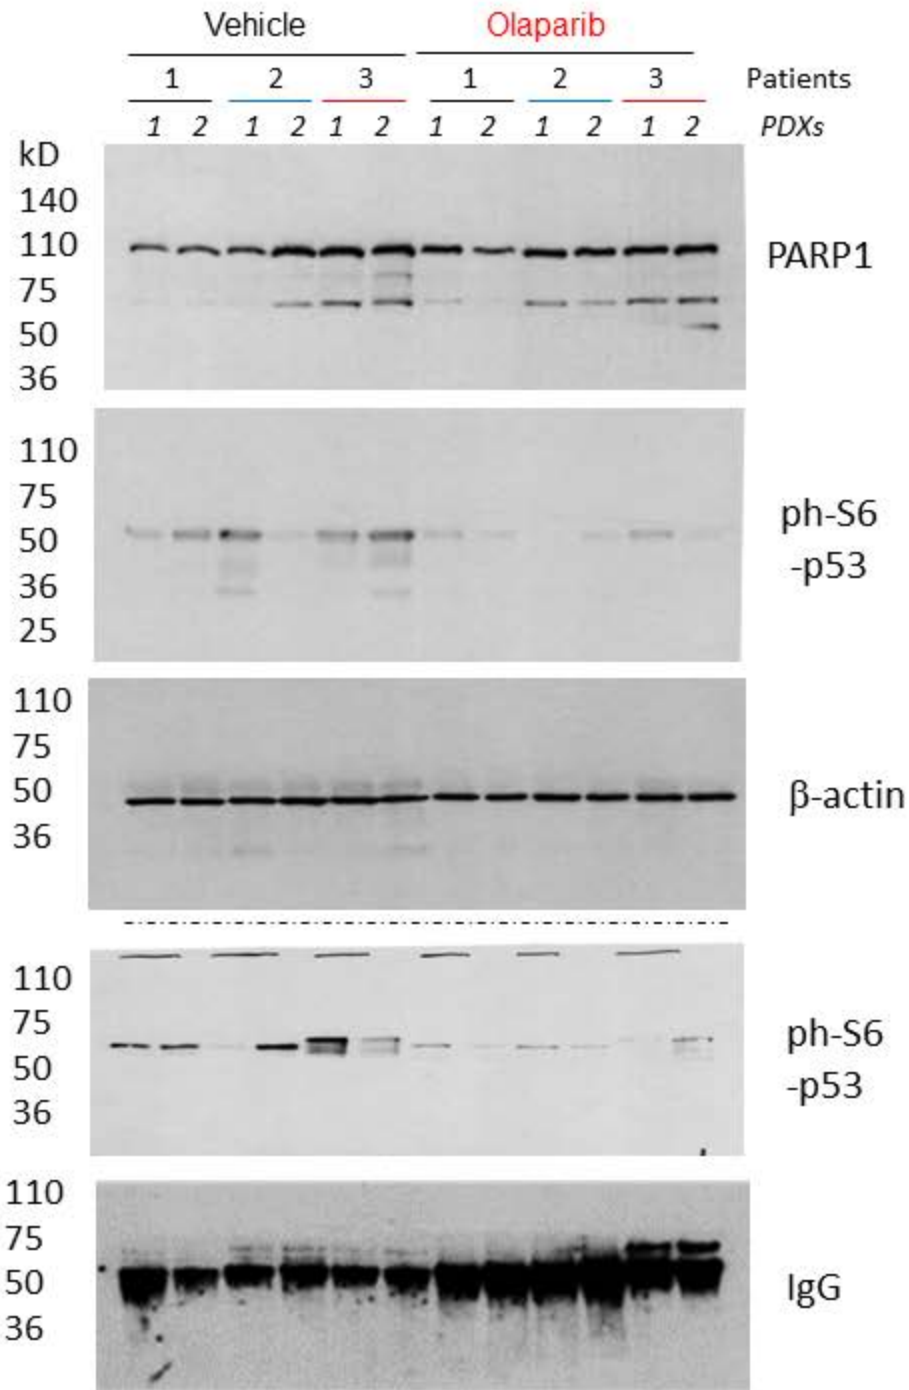

PARP1 IP

FIG 5C

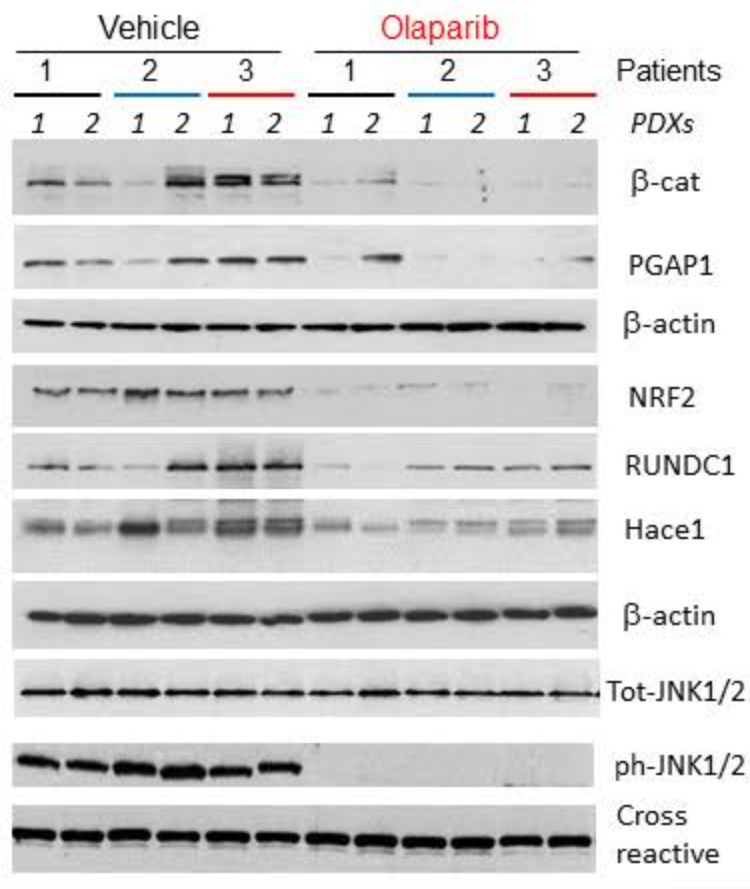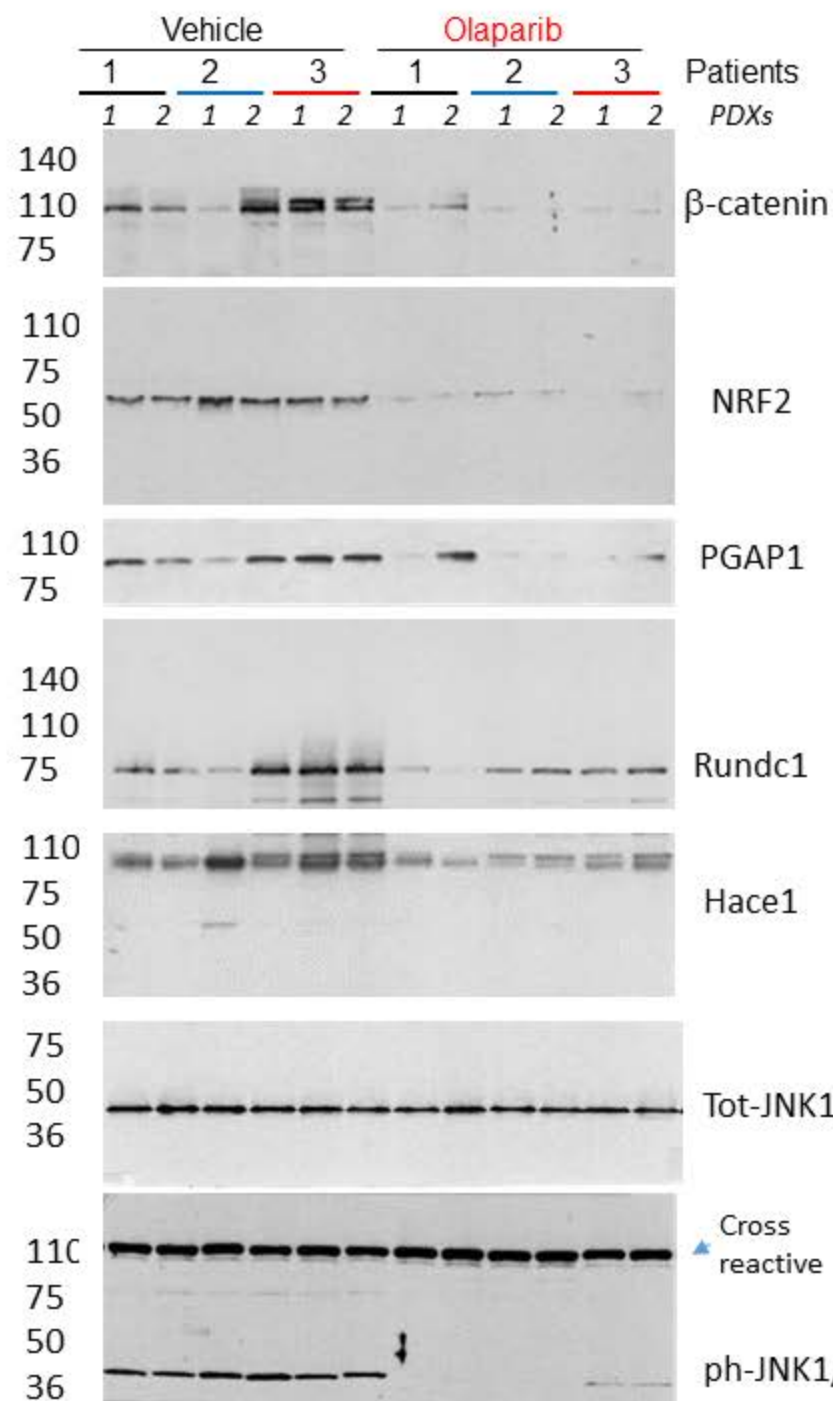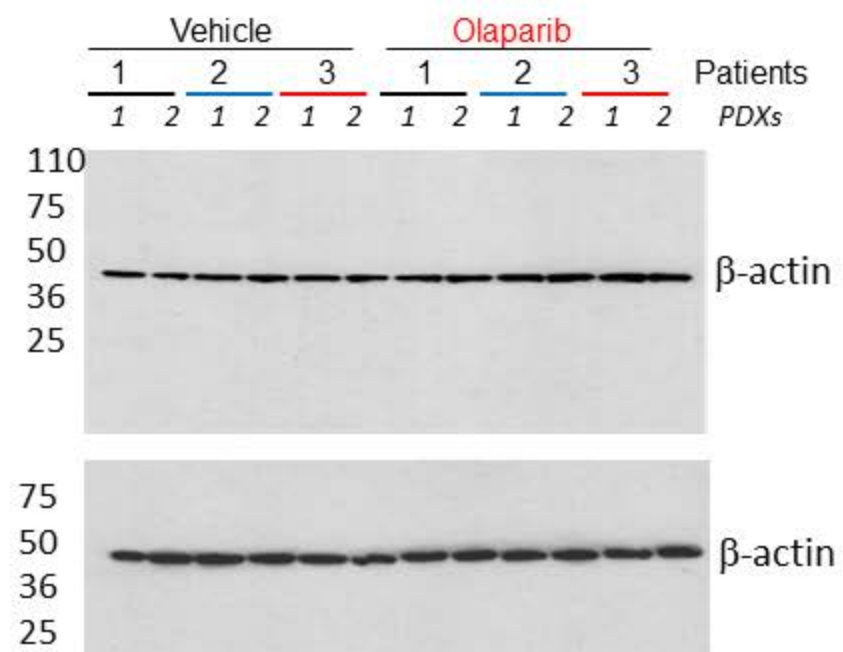

Whole images

Johnston Fig 5E

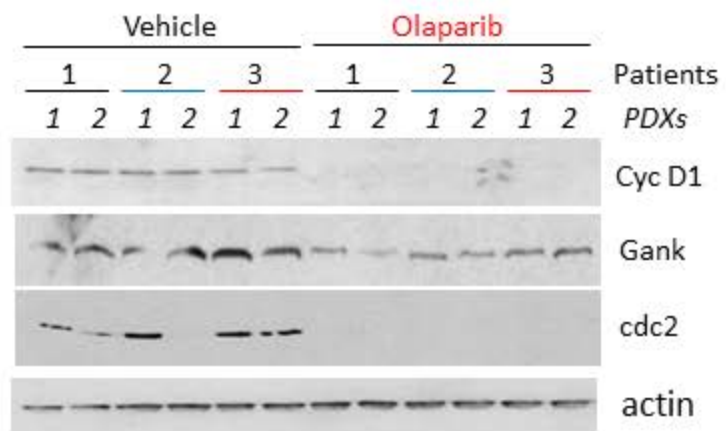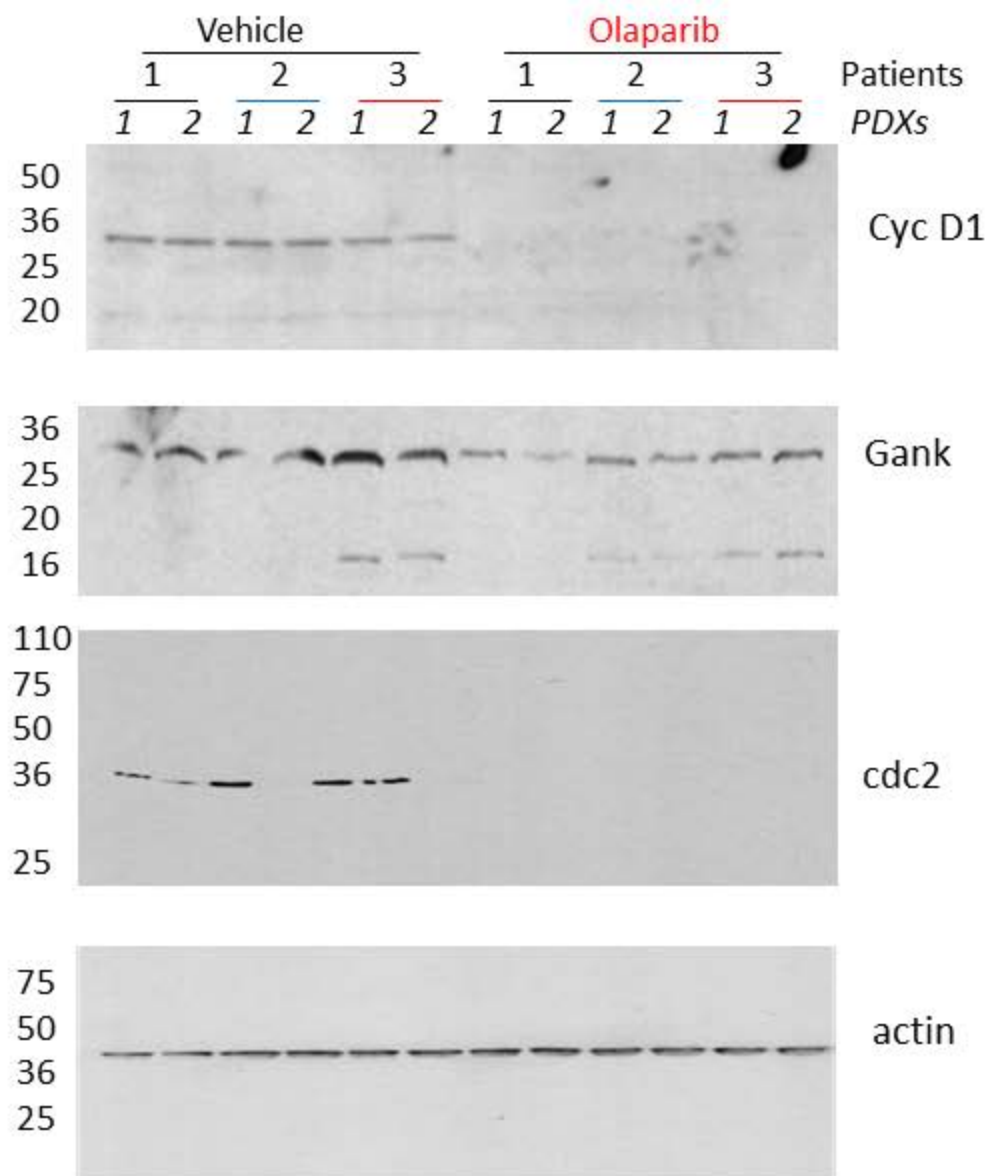

Fig 7A

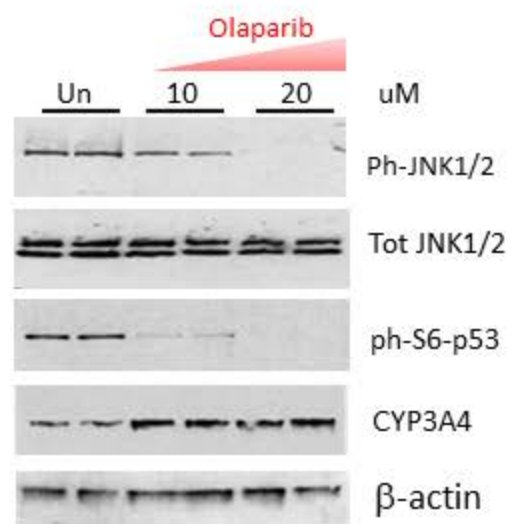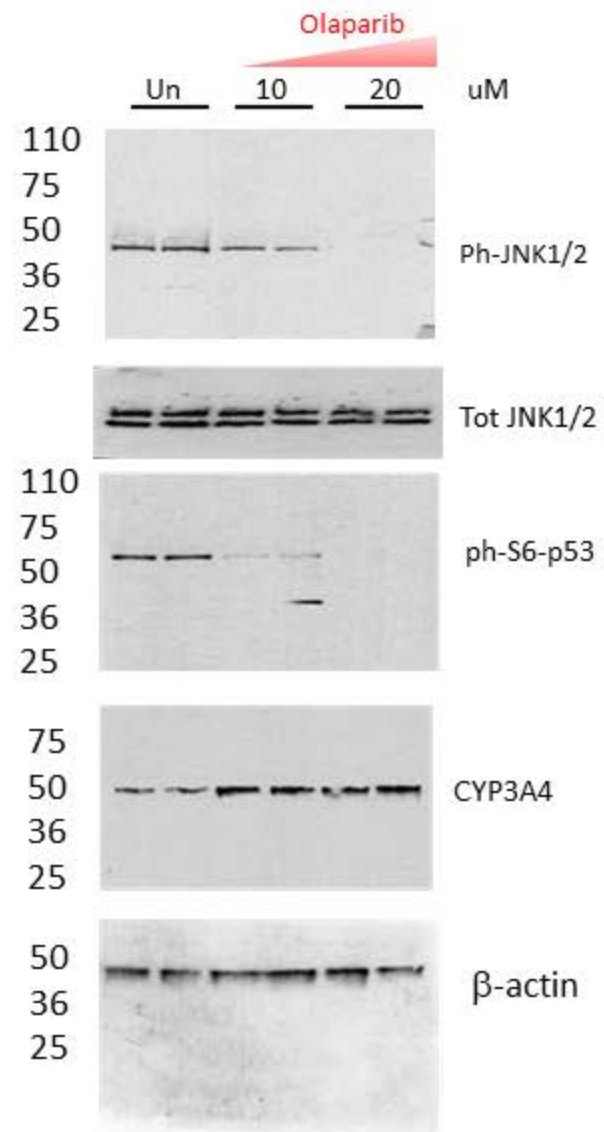

Full images

Fig 7C

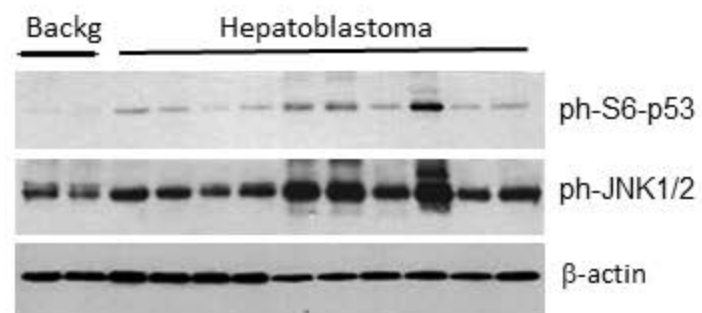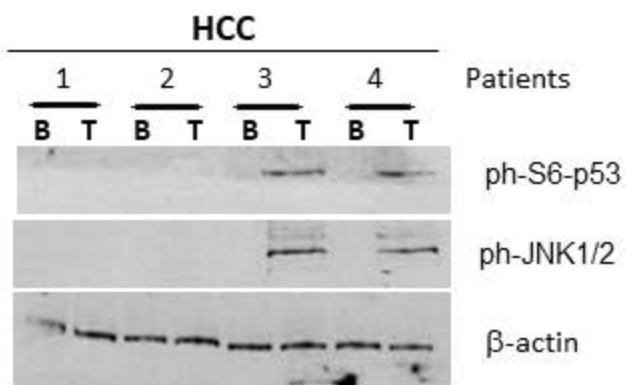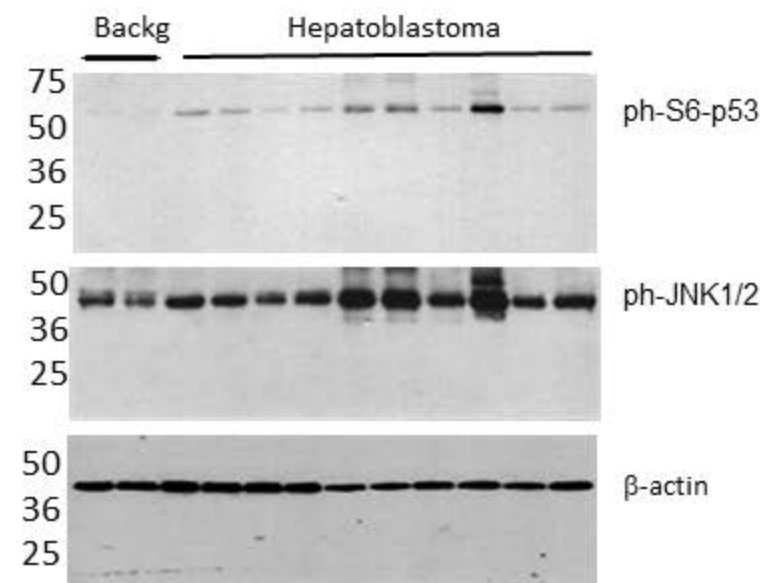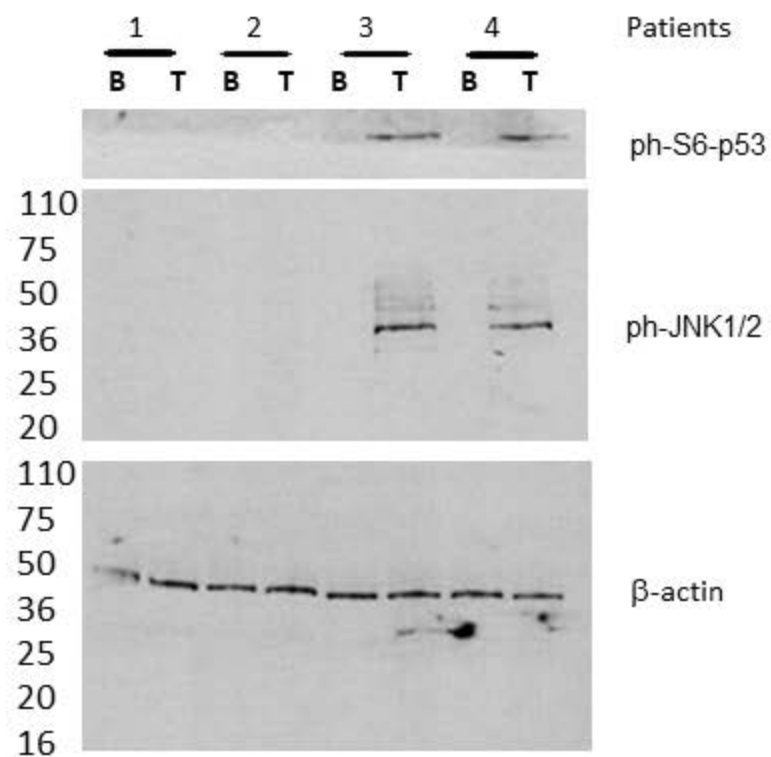

Whole images
